# Supplementary material for: Integration of DInSAR Time Series and GNSS Data for Continuous Volcanic Deformation Monitoring and Eruption Early Warning Applications
Source: MDPI journal article supplement (doi:10.3390/rs14030784), 2022-02-08
Supplement: s1 [file s1]

## **Supplementary Material for InSAR+GNSS Time Series Integration:**

***Supplementary List S1: List of 250 descending Sentinel-1 A/B SLC image IDs used in this study from Path 87 Frame 526 between November 23, 2015 – April 13, 2021.***

S1A\_IW\_SLC\_\_1SDV\_20210413T161621\_20210413T161648\_037434\_0469A3\_AD8B-SLC  
S1B\_IW\_SLC\_\_1SDV\_20210407T161539\_20210407T161606\_026363\_0325AE\_8117-SLC  
S1B\_IW\_SLC\_\_1SDV\_20210326T161539\_20210326T161606\_026188\_032020\_A2A0-SLC  
S1A\_IW\_SLC\_\_1SDV\_20210320T161621\_20210320T161648\_037084\_045D8C\_C34C-SLC  
S1B\_IW\_SLC\_\_1SDV\_20210314T161539\_20210314T161606\_026013\_031A91\_0025-SLC  
S1A\_IW\_SLC\_\_1SDV\_20210308T161621\_20210308T161648\_036909\_04576F\_1D1F-SLC  
S1B\_IW\_SLC\_\_1SDV\_20210302T161539\_20210302T161606\_025838\_0314E4\_C6CC-SLC  
S1A\_IW\_SLC\_\_1SDV\_20210224T161621\_20210224T161648\_036734\_045152\_035E-SLC  
S1B\_IW\_SLC\_\_1SDV\_20210218T161539\_20210218T161606\_025663\_030F29\_6B49-SLC  
S1A\_IW\_SLC\_\_1SDV\_20210212T161621\_20210212T161648\_036559\_044B3D\_C4F1-SLC  
S1B\_IW\_SLC\_\_1SDV\_20210206T161539\_20210206T161606\_025488\_030973\_EAF9-SLC  
S1A\_IW\_SLC\_\_1SDV\_20210131T161621\_20210131T161648\_036384\_044526\_9861-SLC  
S1B\_IW\_SLC\_\_1SDV\_20210125T161540\_20210125T161607\_025313\_0303C9\_2092-SLC  
S1A\_IW\_SLC\_\_1SDV\_20210119T161622\_20210119T161648\_036209\_043F19\_7AB5-SLC  
S1B\_IW\_SLC\_\_1SDV\_20210113T161540\_20210113T161607\_025138\_02FE3B\_A0E6-SLC  
S1A\_IW\_SLC\_\_1SDV\_20210107T161622\_20210107T161649\_036034\_0438F1\_97A4-SLC  
S1B\_IW\_SLC\_\_1SDV\_20210101T161541\_20210101T161608\_024963\_02F899\_751A-SLC  
S1A\_IW\_SLC\_\_1SDV\_20201226T161623\_20201226T161650\_035859\_0432E0\_C868-SLC  
S1B\_IW\_SLC\_\_1SDV\_20201220T161541\_20201220T161608\_024788\_02F2F7\_CCBE-SLC  
S1A\_IW\_SLC\_\_1SDV\_20201214T161623\_20201214T161650\_035684\_042CCF\_259B-SLC  
S1B\_IW\_SLC\_\_1SDV\_20201208T161542\_20201208T161609\_024613\_02ED45\_2955-SLC  
S1A\_IW\_SLC\_\_1SDV\_20201202T161624\_20201202T161651\_035509\_0426D2\_8FEA-SLC  
S1B\_IW\_SLC\_\_1SDV\_20201126T161542\_20201126T161609\_024438\_02E7AB\_80D6-SLC  
S1A\_IW\_SLC\_\_1SDV\_20201120T161624\_20201120T161651\_035334\_0420BD\_F007-SLC  
S1B\_IW\_SLC\_\_1SDV\_20201114T161543\_20201114T161609\_024263\_02E22A\_52DA-SLC  
S1A\_IW\_SLC\_\_1SDV\_20201108T161624\_20201108T161651\_035159\_041AA3\_1A68-SLC  
S1B\_IW\_SLC\_\_1SDV\_20201102T161543\_20201102T161610\_024088\_02DCA9\_DD1A-SLC  
S1A\_IW\_SLC\_\_1SDV\_20201027T161625\_20201027T161652\_034984\_04149F\_A5E0-SLC  
S1B\_IW\_SLC\_\_1SDV\_20201021T161542\_20201021T161609\_023913\_02D73C\_66A0-SLC  
S1A\_IW\_SLC\_\_1SDV\_20201015T161625\_20201015T161652\_034809\_040E95\_0967-SLC  
S1B\_IW\_SLC\_\_1SDV\_20201009T161543\_20201009T161610\_023738\_02D1C3\_C5C0-SLC  
S1A\_IW\_SLC\_\_1SDV\_20201003T161625\_20201003T161651\_034634\_04087E\_2FD4-SLC  
S1B\_IW\_SLC\_\_1SDV\_20200927T161542\_20200927T161609\_023563\_02CC58\_C487-SLC  
S1A\_IW\_SLC\_\_1SDV\_20200921T161624\_20200921T161651\_034459\_04025D\_BC16-SLC  
S1B\_IW\_SLC\_\_1SDV\_20200915T161542\_20200915T161609\_023388\_02C6DA\_82E7-SLC  
S1A\_IW\_SLC\_\_1SDV\_20200909T161624\_20200909T161651\_034284\_03FC1A\_99BF-SLC  
S1B\_IW\_SLC\_\_1SDV\_20200903T161542\_20200903T161609\_023213\_02C156\_CD05-SLC  
S1A\_IW\_SLC\_\_1SDV\_20200828T161623\_20200828T161650\_034109\_03F5F8\_CC8E-SLC  
S1B\_IW\_SLC\_\_1SDV\_20200822T161541\_20200822T161608\_023038\_02BBE8\_2C27-SLC  
S1A\_IW\_SLC\_\_1SDV\_20200816T161623\_20200816T161650\_033934\_03EFCE\_20F0-SLC  
S1B\_IW\_SLC\_\_1SDV\_20200810T161540\_20200810T161607\_022863\_02B66A\_1C00-SLC  
S1A\_IW\_SLC\_\_1SDV\_20200804T161622\_20200804T161649\_033759\_03E9B6\_BDDA-SLC  
S1B\_IW\_SLC\_\_1SDV\_20200729T161540\_20200729T161607\_022688\_02B106\_C974-SLC  
S1A\_IW\_SLC\_\_1SDV\_20200723T161621\_20200723T161648\_033584\_03E461\_3CAE-SLC  
S1B\_IW\_SLC\_\_1SDV\_20200717T161539\_20200717T161606\_022513\_02ABB2\_FF9A-SLC  
S1B\_IW\_SLC\_\_1SDV\_20200705T161538\_20200705T161605\_022338\_02A665\_EAD0-SLC  
S1A\_IW\_SLC\_\_1SDV\_20200629T161620\_20200629T161647\_033234\_03D9B0\_B784-SLC  
S1B\_IW\_SLC\_\_1SDV\_20200623T161538\_20200623T161604\_022163\_02A10F\_4D32-SLC

S1A\_IW\_SLC\_\_1SDV\_20200617T161619\_20200617T161646\_033059\_03D45F\_3801-SLC  
S1B\_IW\_SLC\_\_1SDV\_20200611T161537\_20200611T161604\_021988\_029BBA\_099F-SLC  
S1A\_IW\_SLC\_\_1SDV\_20200605T161618\_20200605T161645\_032884\_03CF1B\_D34B-SLC  
S1A\_IW\_SLC\_\_1SDV\_20200524T161618\_20200524T161645\_032709\_03C9EE\_1C76-SLC  
S1B\_IW\_SLC\_\_1SDV\_20200518T161535\_20200518T161602\_021638\_029146\_2FFC-SLC  
S1A\_IW\_SLC\_\_1SDV\_20200512T161617\_20200512T161644\_032534\_03C49F\_004C-SLC  
S1B\_IW\_SLC\_\_1SDV\_20200506T161535\_20200506T161602\_021463\_028C11\_C502-SLC  
S1A\_IW\_SLC\_\_1SDV\_20200430T161616\_20200430T161643\_032359\_03BEE1\_879C-SLC  
S1B\_IW\_SLC\_\_1SDV\_20200424T161534\_20200424T161601\_021288\_028688\_1D1E-SLC  
S1A\_IW\_SLC\_\_1SDV\_20200418T161616\_20200418T161643\_032184\_03B8BF\_F8B2-SLC  
S1B\_IW\_SLC\_\_1SDV\_20200412T161534\_20200412T161601\_021113\_028103\_CC2C-SLC  
S1A\_IW\_SLC\_\_1SDV\_20200406T161615\_20200406T161642\_032009\_03B293\_CAC1-SLC  
S1B\_IW\_SLC\_\_1SDV\_20200331T161533\_20200331T161600\_020938\_027B76\_F80E-SLC  
S1A\_IW\_SLC\_\_1SDV\_20200325T161615\_20200325T161642\_031834\_03AC6C\_0152-SLC  
S1B\_IW\_SLC\_\_1SDV\_20200319T161533\_20200319T161600\_020763\_0275EF\_7E45-SLC  
S1A\_IW\_SLC\_\_1SDV\_20200313T161615\_20200313T161642\_031659\_03A63C\_DEC8-SLC  
S1B\_IW\_SLC\_\_1SDV\_20200307T161533\_20200307T161600\_020588\_027062\_CC4B-SLC  
S1A\_IW\_SLC\_\_1SDV\_20200301T161615\_20200301T161642\_031484\_03A028\_0039-SLC  
S1B\_IW\_SLC\_\_1SDV\_20200224T161533\_20200224T161600\_020413\_026AD4\_4AC9-SLC  
S1A\_IW\_SLC\_\_1SDV\_20200218T161615\_20200218T161642\_031309\_039A29\_36D8-SLC  
S1B\_IW\_SLC\_\_1SDV\_20200212T161533\_20200212T161600\_020238\_026532\_0EB2-SLC  
S1A\_IW\_SLC\_\_1SDV\_20200206T161615\_20200206T161642\_031134\_03941A\_B825-SLC  
S1B\_IW\_SLC\_\_1SDV\_20200131T161533\_20200131T161600\_020063\_025F88\_ED24-SLC  
S1A\_IW\_SLC\_\_1SDV\_20200125T161615\_20200125T161642\_030959\_038E00\_F6F0-SLC  
S1B\_IW\_SLC\_\_1SDV\_20200119T161534\_20200119T161601\_019888\_0259E8\_E6E5-SLC  
S1A\_IW\_SLC\_\_1SDV\_20200113T161616\_20200113T161643\_030784\_0387D6\_01CE-SLC  
S1B\_IW\_SLC\_\_1SDV\_20200107T161534\_20200107T161601\_019713\_025456\_B62E-SLC  
S1A\_IW\_SLC\_\_1SDV\_20200101T161616\_20200101T161643\_030609\_0381C0\_FBCE-SLC  
S1B\_IW\_SLC\_\_1SDV\_20191226T161535\_20191226T161602\_019538\_024EC2\_C998-SLC  
S1A\_IW\_SLC\_\_1SDV\_20191220T161617\_20191220T161644\_030434\_037BB6\_D0CD-SLC  
S1B\_IW\_SLC\_\_1SDV\_20191214T161535\_20191214T161602\_019363\_024934\_BBEA-SLC  
S1A\_IW\_SLC\_\_1SDV\_20191208T161617\_20191208T161644\_030259\_0375A4\_84A0-SLC  
S1B\_IW\_SLC\_\_1SDV\_20191202T161536\_20191202T161603\_019188\_0243A3\_08A9-SLC  
S1A\_IW\_SLC\_\_1SDV\_20191126T161618\_20191126T161645\_030084\_036FA3\_3F49-SLC  
S1B\_IW\_SLC\_\_1SDV\_20191120T161536\_20191120T161603\_019013\_023E15\_D5A6-SLC  
S1A\_IW\_SLC\_\_1SDV\_20191114T161618\_20191114T161645\_029909\_036991\_BB3C-SLC  
S1B\_IW\_SLC\_\_1SDV\_20191108T161536\_20191108T161603\_018838\_02386D\_53B1-SLC  
S1A\_IW\_SLC\_\_1SDV\_20191102T161618\_20191102T161645\_029734\_03636D\_018F-SLC  
S1B\_IW\_SLC\_\_1SDV\_20191027T161536\_20191027T161603\_018663\_0232C3\_946E-SLC  
S1A\_IW\_SLC\_\_1SDV\_20191021T161618\_20191021T161645\_029559\_035D59\_D964-SLC  
S1B\_IW\_SLC\_\_1SDV\_20191015T161536\_20191015T161603\_018488\_022D65\_8C28-SLC  
S1A\_IW\_SLC\_\_1SDV\_20191009T161618\_20191009T161645\_029384\_03574D\_1787-SLC  
S1B\_IW\_SLC\_\_1SDV\_20191003T161536\_20191003T161603\_018313\_0227F9\_4F4D-SLC  
S1A\_IW\_SLC\_\_1SDV\_20190927T161618\_20190927T161645\_029209\_035145\_DD78-SLC  
S1B\_IW\_SLC\_\_1SDV\_20190921T161536\_20190921T161603\_018138\_022287\_7B38-SLC  
S1A\_IW\_SLC\_\_1SDV\_20190915T161617\_20190915T161644\_029034\_034B50\_853C-SLC  
S1B\_IW\_SLC\_\_1SDV\_20190909T161536\_20190909T161603\_017963\_021D1D\_0940-SLC  
S1A\_IW\_SLC\_\_1SDV\_20190903T161617\_20190903T161644\_028859\_034539\_4E57-SLC  
S1B\_IW\_SLC\_\_1SDV\_20190828T161535\_20190828T161602\_017788\_02179E\_A3C4-SLC  
S1A\_IW\_SLC\_\_1SDV\_20190822T161617\_20190822T161643\_028684\_033F1E\_9AF3-SLC  
S1B\_IW\_SLC\_\_1SDV\_20190816T161534\_20190816T161601\_017613\_021230\_1723-SLC  
S1A\_IW\_SLC\_\_1SDV\_20190810T161616\_20190810T161643\_028509\_033911\_7640-SLC  
S1B\_IW\_SLC\_\_1SDV\_20190804T161534\_20190804T161601\_017438\_020CC8\_40F7-SLC

S1A\_IW\_SLC\_\_1SDV\_20190729T161615\_20190729T161642\_028334\_033397\_E1A6-SLC  
S1B\_IW\_SLC\_\_1SDV\_20190723T161533\_20190723T161600\_017263\_020785\_7D6A-SLC  
S1A\_IW\_SLC\_\_1SDV\_20190717T161614\_20190717T161641\_028159\_032E3F\_2630-SLC  
S1B\_IW\_SLC\_\_1SDV\_20190711T161532\_20190711T161559\_017088\_02026E\_184C-SLC  
S1A\_IW\_SLC\_\_1SDV\_20190705T161613\_20190705T161640\_027984\_0328F2\_A172-SLC  
S1B\_IW\_SLC\_\_1SDV\_20190629T161531\_20190629T161558\_016913\_01FD48\_96B5-SLC  
S1A\_IW\_SLC\_\_1SDV\_20190623T161613\_20190623T161640\_027809\_0323A9\_E521-SLC  
S1B\_IW\_SLC\_\_1SDV\_20190617T161531\_20190617T161558\_016738\_01F819\_112C-SLC  
S1A\_IW\_SLC\_\_1SDV\_20190611T161612\_20190611T161639\_027634\_031E71\_9925-SLC  
S1B\_IW\_SLC\_\_1SDV\_20190605T161530\_20190605T161557\_016563\_01F2E7\_E554-SLC  
S1A\_IW\_SLC\_\_1SDV\_20190530T161611\_20190530T161638\_027459\_031916\_4797-SLC  
S1B\_IW\_SLC\_\_1SDV\_20190524T161529\_20190524T161556\_016388\_01EDA2\_21C4-SLC  
S1A\_IW\_SLC\_\_1SDV\_20190518T161611\_20190518T161638\_027284\_0313A1\_AE8A-SLC  
S1B\_IW\_SLC\_\_1SDV\_20190512T161529\_20190512T161556\_016213\_01E839\_26B7-SLC  
S1A\_IW\_SLC\_\_1SDV\_20190506T161610\_20190506T161637\_027109\_030E29\_5A71-SLC  
S1B\_IW\_SLC\_\_1SDV\_20190430T161528\_20190430T161555\_016038\_01E295\_8D96-SLC  
S1A\_IW\_SLC\_\_1SDV\_20190424T161610\_20190424T161637\_026934\_0307C6\_C173-SLC  
S1B\_IW\_SLC\_\_1SDV\_20190418T161528\_20190418T161555\_015863\_01DCBB\_C128-SLC  
S1A\_IW\_SLC\_\_1SDV\_20190412T161609\_20190412T161636\_026759\_030170\_0C87-SLC  
S1B\_IW\_SLC\_\_1SDV\_20190406T161527\_20190406T161554\_015688\_01D6F3\_6288-SLC  
S1A\_IW\_SLC\_\_1SDV\_20190331T161609\_20190331T161636\_026584\_02FB08\_E9DE-SLC  
S1B\_IW\_SLC\_\_1SDV\_20190325T161527\_20190325T161554\_015513\_01D128\_9198-SLC  
S1A\_IW\_SLC\_\_1SDV\_20190319T161609\_20190319T161635\_026409\_02F499\_30DE-SLC  
S1B\_IW\_SLC\_\_1SDV\_20190313T161527\_20190313T161554\_015338\_01CB78\_2D1E-SLC  
S1A\_IW\_SLC\_\_1SDV\_20190307T161609\_20190307T161636\_026234\_02EE1E\_3DB6-SLC  
S1B\_IW\_SLC\_\_1SDV\_20190301T161527\_20190301T161554\_015163\_01C5BB\_648F-SLC  
S1A\_IW\_SLC\_\_1SDV\_20190223T161609\_20190223T161635\_026059\_02E7DA\_651E-SLC  
S1B\_IW\_SLC\_\_1SDV\_20190217T161527\_20190217T161554\_014988\_01C003\_3A21-SLC  
S1A\_IW\_SLC\_\_1SDV\_20190211T161609\_20190211T161636\_025884\_02E1A0\_FE75-SLC  
S1B\_IW\_SLC\_\_1SDV\_20190205T161527\_20190205T161554\_014813\_01BA44\_34FF-SLC  
S1A\_IW\_SLC\_\_1SDV\_20190130T161609\_20190130T161636\_025709\_02DB5D\_5555-SLC  
S1B\_IW\_SLC\_\_1SDV\_20190124T161527\_20190124T161554\_014638\_01B482\_A1A0-SLC  
S1A\_IW\_SLC\_\_1SDV\_20190118T161609\_20190118T161636\_025534\_02D4F7\_4F67-SLC  
S1B\_IW\_SLC\_\_1SDV\_20190112T161528\_20190112T161555\_014463\_01AEEC\_3C72-SLC  
S1A\_IW\_SLC\_\_1SDV\_20190106T161610\_20190106T161637\_025359\_02CEA7\_7B38-SLC  
S1B\_IW\_SLC\_\_1SDV\_20181231T161528\_20181231T161555\_014288\_01A94A\_47EF-SLC  
S1A\_IW\_SLC\_\_1SDV\_20181225T161610\_20181225T161637\_025184\_02C858\_98D2-SLC  
S1B\_IW\_SLC\_\_1SDV\_20181219T161529\_20181219T161556\_014113\_01A37C\_3463-SLC  
S1A\_IW\_SLC\_\_1SDV\_20181213T161610\_20181213T161637\_025009\_02C200\_5C85-SLC  
S1B\_IW\_SLC\_\_1SDV\_20181207T161529\_20181207T161556\_013938\_019DBF\_5D98-SLC  
S1A\_IW\_SLC\_\_1SDV\_20181201T161611\_20181201T161638\_024834\_02BBEE\_6EF4-SLC  
S1A\_IW\_SLC\_\_1SDV\_20181119T161612\_20181119T161638\_024659\_02B5BA\_44ED-SLC  
S1B\_IW\_SLC\_\_1SDV\_20181113T161530\_20181113T161557\_013588\_01927D\_7383-SLC  
S1A\_IW\_SLC\_\_1SDV\_20181107T161608\_20181107T161643\_024484\_02AF45\_24C2-SLC  
S1B\_IW\_SLC\_\_1SDV\_20181101T161530\_20181101T161557\_013413\_018D11\_5076-SLC  
S1A\_IW\_SLC\_\_1SDV\_20181026T161608\_20181026T161644\_024309\_02A937\_D893-SLC  
S1B\_IW\_SLC\_\_1SDV\_20181020T161533\_20181020T161600\_013238\_018791\_C42B-SLC  
S1A\_IW\_SLC\_\_1SDV\_20181014T161608\_20181014T161644\_024134\_02A394\_79B2-SLC  
S1B\_IW\_SLC\_\_1SDV\_20181008T161533\_20181008T161600\_013063\_018228\_5452-SLC  
S1A\_IW\_SLC\_\_1SDV\_20181002T161608\_20181002T161643\_023959\_029DD7\_03E1-SLC  
S1B\_IW\_SLC\_\_1SDV\_20180926T161532\_20180926T161559\_012888\_017CD1\_7657-SLC  
S1A\_IW\_SLC\_\_1SDV\_20180920T161608\_20180920T161643\_023784\_029822\_52BC-SLC  
S1B\_IW\_SLC\_\_1SDV\_20180914T161532\_20180914T161559\_012713\_01776E\_0076-SLC

S1A\_IW\_SLC\_\_1SDV\_20180908T161607\_20180908T161643\_023609\_029284\_32AE-SLC  
S1B\_IW\_SLC\_\_1SDV\_20180902T161532\_20180902T161559\_012538\_017218\_2664-SLC  
S1A\_IW\_SLC\_\_1SDV\_20180827T161607\_20180827T161642\_023434\_028CEA\_210F-SLC  
S1B\_IW\_SLC\_\_1SDV\_20180821T161531\_20180821T161558\_012363\_016CAF\_CC74-SLC  
S1A\_IW\_SLC\_\_1SDV\_20180815T161606\_20180815T161642\_023259\_02874A\_79C7-SLC  
S1B\_IW\_SLC\_\_1SDV\_20180809T161530\_20180809T161557\_012188\_01673B\_569C-SLC  
S1A\_IW\_SLC\_\_1SDV\_20180803T161605\_20180803T161641\_023084\_0281AA\_A677-SLC  
S1B\_IW\_SLC\_\_1SDV\_20180728T161530\_20180728T161557\_012013\_0161DF\_09AF-SLC  
S1A\_IW\_SLC\_\_1SDV\_20180722T161605\_20180722T161640\_022909\_027C2D\_6BA8-SLC  
S1B\_IW\_SLC\_\_1SDV\_20180716T161529\_20180716T161556\_011838\_015C9C\_9CFC-SLC  
S1A\_IW\_SLC\_\_1SDV\_20180710T161604\_20180710T161639\_022734\_0276BD\_7F8C-SLC  
S1B\_IW\_SLC\_\_1SDV\_20180704T161528\_20180704T161555\_011663\_01573A\_ABD3-SLC  
S1A\_IW\_SLC\_\_1SDV\_20180628T161603\_20180628T161639\_022559\_027193\_CF3A-SLC  
S1B\_IW\_SLC\_\_1SDV\_20180622T161528\_20180622T161554\_011488\_0151C5\_C29B-SLC  
S1A\_IW\_SLC\_\_1SDV\_20180616T161603\_20180616T161638\_022384\_026C76\_4F43-SLC  
S1B\_IW\_SLC\_\_1SDV\_20180610T161527\_20180610T161554\_011313\_014C5B\_3DBD-SLC  
S1A\_IW\_SLC\_\_1SDV\_20180604T161602\_20180604T161637\_022209\_026711\_A413-SLC  
S1B\_IW\_SLC\_\_1SDV\_20180529T161526\_20180529T161553\_011138\_0146D9\_8CBE-SLC  
S1B\_IW\_SLC\_\_1SDV\_20180517T161525\_20180517T161552\_010963\_01411F\_59D5-SLC  
S1B\_IW\_SLC\_\_1SDV\_20180505T161525\_20180505T161552\_010788\_013B7D\_25D2-SLC  
S1B\_IW\_SLC\_\_1SDV\_20180423T161524\_20180423T161551\_010613\_0135DD\_33F0-SLC  
S1B\_IW\_SLC\_\_1SDV\_20180411T161524\_20180411T161551\_010438\_013047\_51DB-SLC  
S1B\_IW\_SLC\_\_1SDV\_20180330T161523\_20180330T161550\_010263\_012A95\_0FF0-SLC  
S1B\_IW\_SLC\_\_1SDV\_20180318T161523\_20180318T161550\_010088\_0124EA\_5ED7-SLC  
S1B\_IW\_SLC\_\_1SDV\_20180306T161523\_20180306T161550\_009913\_011F32\_0A1D-SLC  
S1B\_IW\_SLC\_\_1SDV\_20180222T161523\_20180222T161550\_009738\_011958\_7097-SLC  
S1B\_IW\_SLC\_\_1SDV\_20180210T161523\_20180210T161550\_009563\_011395\_5129-SLC  
S1B\_IW\_SLC\_\_1SDV\_20180129T161523\_20180129T161550\_009388\_010DCE\_DD6D-SLC  
S1B\_IW\_SLC\_\_1SDV\_20180117T161524\_20180117T161551\_009213\_010817\_DE19-SLC  
S1B\_IW\_SLC\_\_1SDV\_20180105T161524\_20180105T161551\_009038\_010267\_0A4B-SLC  
S1B\_IW\_SLC\_\_1SDV\_20171224T161525\_20171224T161552\_008863\_00FCB8\_2DFF-SLC  
S1B\_IW\_SLC\_\_1SDV\_20171212T161525\_20171212T161552\_008688\_00F723\_A4FC-SLC  
S1B\_IW\_SLC\_\_1SDV\_20171130T161526\_20171130T161552\_008513\_00F194\_91E8-SLC  
S1B\_IW\_SLC\_\_1SDV\_20171118T161526\_20171118T161553\_008338\_00EC22\_0053-SLC  
S1B\_IW\_SLC\_\_1SDV\_20171106T161526\_20171106T161553\_008163\_00E6D6\_3A7A-SLC  
S1B\_IW\_SLC\_\_1SDV\_20171025T161526\_20171025T161553\_007988\_00E1CF\_5F57-SLC  
S1B\_IW\_SLC\_\_1SDV\_20171013T161526\_20171013T161553\_007813\_00DCCA\_F703-SLC  
S1B\_IW\_SLC\_\_1SDV\_20171001T161526\_20171001T161553\_007638\_00D7CF\_6462-SLC  
S1B\_IW\_SLC\_\_1SDV\_20170919T161526\_20170919T161553\_007463\_00D2CB\_A5EB-SLC  
S1B\_IW\_SLC\_\_1SDV\_20170907T161525\_20170907T161552\_007288\_00CDAA\_4370-SLC  
S1B\_IW\_SLC\_\_1SDV\_20170826T161525\_20170826T161552\_007113\_00C894\_3D97-SLC  
S1B\_IW\_SLC\_\_1SDV\_20170814T161524\_20170814T161551\_006938\_00C386\_DA9C-SLC  
S1B\_IW\_SLC\_\_1SDV\_20170721T161523\_20170721T161550\_006588\_00B961\_3ED4-SLC  
S1B\_IW\_SLC\_\_1SDV\_20170709T161522\_20170709T161549\_006413\_00B462\_B7D3-SLC  
S1B\_IW\_SLC\_\_1SDV\_20170627T161521\_20170627T161548\_006238\_00AF6E\_D097-SLC  
S1B\_IW\_SLC\_\_1SDV\_20170615T161521\_20170615T161548\_006063\_00AA5C\_D133-SLC  
S1B\_IW\_SLC\_\_1SDV\_20170603T161520\_20170603T161547\_005888\_00A534\_756B-SLC  
S1B\_IW\_SLC\_\_1SDV\_20170522T161519\_20170522T161546\_005713\_00A024\_F5C0-SLC  
S1B\_IW\_SLC\_\_1SDV\_20170510T161519\_20170510T161545\_005538\_009B37\_1922-SLC  
S1A\_IW\_SLC\_\_1SDV\_20170504T161600\_20170504T161627\_016434\_01B385\_46EE-SLC  
S1B\_IW\_SLC\_\_1SDV\_20170428T161518\_20170428T161545\_005363\_009668\_72A6-SLC  
S1A\_IW\_SLC\_\_1SDV\_20170422T161600\_20170422T161627\_016259\_01AE3E\_F05A-SLC  
S1A\_IW\_SLC\_\_1SDV\_20170410T161559\_20170410T161626\_016084\_01A8E3\_0184-SLC

S1A\_IW\_SLC\_\_1SDV\_20170329T161559\_20170329T161626\_015909\_01A39D\_42FB-SLC  
 S1A\_IW\_SLC\_\_1SDV\_20170317T161558\_20170317T161625\_015734\_019E68\_4C4E-SLC  
 S1A\_IW\_SLC\_\_1SDV\_20170305T161558\_20170305T161625\_015559\_01992C\_645D-SLC  
 S1A\_IW\_SLC\_\_1SDV\_20170221T161558\_20170221T161625\_015384\_0193E1\_2609-SLC  
 S1A\_IW\_SLC\_\_1SDV\_20170209T161558\_20170209T161625\_015209\_018E74\_BB33-SLC  
 S1A\_IW\_SLC\_\_1SDV\_20170128T161559\_20170128T161626\_015034\_0188FD\_F241-SLC  
 S1A\_IW\_SLC\_\_1SDV\_20170116T161559\_20170116T161626\_014859\_01839F\_6CBF-SLC  
 S1A\_IW\_SLC\_\_1SDV\_20170104T161559\_20170104T161626\_014684\_017E37\_BF5E-SLC  
 S1A\_IW\_SLC\_\_1SDV\_20161223T161601\_20161223T161628\_014509\_0178E5\_6A13-SLC  
 S1A\_IW\_SLC\_\_1SDV\_20161211T161601\_20161211T161628\_014334\_01736F\_A485-SLC  
 S1A\_IW\_SLC\_\_1SDV\_20161129T161602\_20161129T161629\_014159\_016DE0\_EFC0-SLC  
 S1A\_IW\_SLC\_\_1SDV\_20161117T161602\_20161117T161629\_013984\_016878\_BCF6-SLC  
 S1A\_IW\_SLC\_\_1SDV\_20161105T161602\_20161105T161629\_013809\_016311\_3BBF-SLC  
 S1B\_IW\_SLC\_\_1SDV\_20161030T161517\_20161030T161544\_002738\_004A21\_F417-SLC  
 S1A\_IW\_SLC\_\_1SDV\_20161024T161602\_20161024T161629\_013634\_015D93\_EF5C-SLC  
 S1A\_IW\_SLC\_\_1SDV\_20161012T161602\_20161012T161629\_013459\_015823\_709A-SLC  
 S1A\_IW\_SLC\_\_1SDV\_20160930T161602\_20160930T161629\_013284\_015298\_C2C4-SLC  
 S1A\_IW\_SLC\_\_1SDV\_20160918T161602\_20160918T161629\_013109\_014CF1\_6240-SLC  
 S1A\_IW\_SLC\_\_1SDV\_20160906T161601\_20160906T161628\_012934\_014741\_3538-SLC  
 S1A\_IW\_SLC\_\_1SDV\_20160825T161601\_20160825T161628\_012759\_01417D\_958F-SLC  
 S1A\_IW\_SLC\_\_1SDV\_20160813T161600\_20160813T161627\_012584\_013B90\_EB0D-SLC  
 S1A\_IW\_SLC\_\_1SDV\_20160801T161600\_20160801T161627\_012409\_0135CD\_6DEE-SLC  
 S1A\_IW\_SLC\_\_1SDV\_20160720T161559\_20160720T161626\_012234\_012FFD\_6F1C-SLC  
 S1A\_IW\_SLC\_\_1SDV\_20160708T161558\_20160708T161625\_012059\_012A55\_8967-SLC  
 S1A\_IW\_SLC\_\_1SDV\_20160614T161557\_20160614T161624\_011709\_011F1F\_0C75-SLC  
 S1A\_IW\_SLC\_\_1SDV\_20160602T161556\_20160602T161623\_011534\_0119A4\_E684-SLC  
 S1A\_IW\_SLC\_\_1SDV\_20160521T161556\_20160521T161623\_011359\_0113FB\_2E2D-SLC  
 S1A\_IW\_SLC\_\_1SDV\_20160509T161552\_20160509T161619\_011184\_010E41\_D16E-SLC  
 S1A\_IW\_SLC\_\_1SDV\_20160427T161552\_20160427T161619\_011009\_0108C4\_5D22-SLC  
 S1A\_IW\_SLC\_\_1SDV\_20160415T161551\_20160415T161618\_010834\_010355\_5208-SLC  
 S1A\_IW\_SLC\_\_1SDV\_20160403T161551\_20160403T161618\_010659\_00FE15\_9CDD-SLC  
 S1A\_IW\_SLC\_\_1SDV\_20160322T161550\_20160322T161617\_010484\_00F904\_310D-SLC  
 S1A\_IW\_SLC\_\_1SDV\_20160310T161550\_20160310T161617\_010309\_00F41E\_BF07-SLC  
 S1A\_IW\_SLC\_\_1SDV\_20160227T161550\_20160227T161617\_010134\_00EF1D\_DA6D-SLC  
 S1A\_IW\_SLC\_\_1SDV\_20160215T161550\_20160215T161617\_009959\_00EA0E\_35FE-SLC  
 S1A\_IW\_SLC\_\_1SDV\_20160203T161550\_20160203T161617\_009784\_00E4F0\_2209-SLC  
 S1A\_IW\_SLC\_\_1SDV\_20160122T161550\_20160122T161617\_009609\_00DFE0\_1FE2-SLC  
 S1A\_IW\_SLC\_\_1SDV\_20160110T161551\_20160110T161618\_009434\_00DABF\_1552-SLC  
 S1A\_IW\_SLC\_\_1SDV\_20151229T161551\_20151229T161618\_009259\_00D5CA\_73AB-SLC  
 S1A\_IW\_SLC\_\_1SDV\_20151217T161551\_20151217T161618\_009084\_00D0C5\_CD08-SLC  
 S1A\_IW\_SLC\_\_1SDV\_20151205T161552\_20151205T161619\_008909\_00CBFB\_9527-SLC  
 S1A\_IW\_SLC\_\_1SDV\_20151123T161552\_20151123T161619\_008734\_00C700\_96C8-SLC  
 S1A\_IW\_SLC\_\_1SDV\_20151111T161552\_20151111T161619\_008559\_00C21C\_709F-SLC

***Supplementary List S2: List of 694 (671 successful) interferometric image date pairs created from List S1 during this study using GMTSAR software and allowing a maximum of 35 days between images.***

|                   |                   |                   |                   |
|-------------------|-------------------|-------------------|-------------------|
| 20151111_20151205 | 20151205_20151217 | 20151217_20160122 | 20160110_20160203 |
| 20151111_20151217 | 20151205_20151229 | 20151229_20160110 | 20160110_20160215 |
| 20151123_20151205 | 20151205_20160110 | 20151229_20160122 | 20160122_20160203 |
| 20151123_20151217 | 20151217_20151229 | 20151229_20160203 | 20160122_20160215 |
| 20151123_20151229 | 20151217_20160110 | 20160110_20160122 | 20160122_20160227 |

|                   |                   |                   |                   |
|-------------------|-------------------|-------------------|-------------------|
| 20160203_20160215 | 20161024_20161117 | 20170428_20170603 | 20171224_20180129 |
| 20160203_20160227 | 20161024_20161129 | 20170504_20170510 | 20180105_20180117 |
| 20160203_20160310 | 20161105_20161117 | 20170504_20170522 | 20180105_20180129 |
| 20160215_20160227 | 20161105_20161129 | 20170504_20170603 | 20180117_20180306 |
| 20160215_20160310 | 20161105_20161211 | 20170510_20170522 | 20180129_20180210 |
| 20160215_20160322 | 20161117_20161129 | 20170510_20170603 | 20180129_20180222 |
| 20160227_20160310 | 20161117_20161211 | 20170510_20170615 | 20180222_20180318 |
| 20160227_20160322 | 20161117_20161223 | 20170522_20170603 | 20180222_20180330 |
| 20160227_20160403 | 20161129_20161211 | 20170522_20170615 | 20180222_20180411 |
| 20160310_20160403 | 20161129_20161223 | 20170522_20170627 | 20180306_20180318 |
| 20160310_20160415 | 20161129_20170104 | 20170603_20170615 | 20180306_20180330 |
| 20160322_20160403 | 20161211_20161223 | 20170603_20170627 | 20180318_20180330 |
| 20160322_20160415 | 20161211_20170104 | 20170603_20170709 | 20180318_20180411 |
| 20160322_20160427 | 20161211_20170116 | 20170615_20170627 | 20180330_20180423 |
| 20160403_20160415 | 20161223_20170104 | 20170615_20170709 | 20180330_20180517 |
| 20160403_20160427 | 20161223_20170116 | 20170615_20170721 | 20180411_20180423 |
| 20160403_20160509 | 20161223_20170128 | 20170627_20170709 | 20180411_20180505 |
| 20160415_20160427 | 20170104_20170116 | 20170627_20170721 | 20180423_20180505 |
| 20160427_20160509 | 20170104_20170128 | 20170709_20170721 | 20180423_20180517 |
| 20160509_20160602 | 20170104_20170209 | 20170709_20170814 | 20180423_20180604 |
| 20160521_20160602 | 20170116_20170128 | 20170721_20170814 | 20180423_20180610 |
| 20160521_20160614 | 20170116_20170209 | 20170721_20170826 | 20180505_20180517 |
| 20160602_20160614 | 20170116_20170221 | 20170814_20170826 | 20180505_20180529 |
| 20160602_20160708 | 20170128_20170209 | 20170814_20170907 | 20180505_20180622 |
| 20160614_20160708 | 20170128_20170221 | 20170814_20170919 | 20180517_20180529 |
| 20160614_20160720 | 20170128_20170305 | 20170826_20170907 | 20180517_20180604 |
| 20160708_20160720 | 20170209_20170221 | 20170826_20170919 | 20180517_20180610 |
| 20160708_20160801 | 20170209_20170305 | 20170826_20171001 | 20180517_20180622 |
| 20160708_20160813 | 20170209_20170317 | 20170907_20170919 | 20180529_20180604 |
| 20160720_20160801 | 20170221_20170305 | 20170907_20171001 | 20180529_20180610 |
| 20160720_20160813 | 20170221_20170317 | 20170919_20171001 | 20180529_20180616 |
| 20160720_20160825 | 20170221_20170329 | 20170919_20171013 | 20180529_20180622 |
| 20160801_20160813 | 20170305_20170317 | 20170919_20171025 | 20180529_20180628 |
| 20160801_20160825 | 20170305_20170329 | 20171001_20171013 | 20180604_20180610 |
| 20160801_20160906 | 20170305_20170410 | 20171001_20171025 | 20180604_20180616 |
| 20160813_20160825 | 20170317_20170329 | 20171001_20171106 | 20180604_20180622 |
| 20160813_20160906 | 20170317_20170410 | 20171025_20171106 | 20180604_20180710 |
| 20160813_20160918 | 20170317_20170422 | 20171025_20171118 | 20180604_20180722 |
| 20160825_20160906 | 20170329_20170410 | 20171025_20171130 | 20180610_20180616 |
| 20160825_20160918 | 20170329_20170422 | 20171106_20171118 | 20180610_20180622 |
| 20160825_20160930 | 20170329_20170428 | 20171106_20171130 | 20180610_20180704 |
| 20160906_20160918 | 20170329_20170504 | 20171106_20171212 | 20180610_20180710 |
| 20160918_20160930 | 20170410_20170422 | 20171118_20171130 | 20180610_20180716 |
| 20160918_20161012 | 20170410_20170428 | 20171118_20171212 | 20180610_20180722 |
| 20160918_20161024 | 20170410_20170504 | 20171118_20171224 | 20180610_20180728 |
| 20160930_20161012 | 20170410_20170510 | 20171130_20171212 | 20180616_20180622 |
| 20160930_20161024 | 20170422_20170428 | 20171130_20171224 | 20180616_20180704 |
| 20160930_20161030 | 20170422_20170504 | 20171130_20180105 | 20180616_20180722 |
| 20160930_20161105 | 20170422_20170510 | 20171212_20171224 | 20180616_20180728 |
| 20161012_20161024 | 20170422_20170522 | 20171212_20180105 | 20180622_20180628 |
| 20161012_20161105 | 20170428_20170504 | 20171212_20180117 | 20180622_20180704 |
| 20161012_20161117 | 20170428_20170510 | 20171224_20180105 | 20180622_20180710 |
| 20161024_20161105 | 20170428_20170522 | 20171224_20180117 | 20180622_20180716 |

|                   |                   |                   |                   |
|-------------------|-------------------|-------------------|-------------------|
| 20180622_20180722 | 20180902_20181002 | 20190106_20190112 | 20190412_20190424 |
| 20180622_20180728 | 20180902_20181014 | 20190106_20190118 | 20190412_20190430 |
| 20180622_20180809 | 20180902_20181020 | 20190106_20190124 | 20190412_20190506 |
| 20180628_20180704 | 20180908_20181002 | 20190106_20190130 | 20190418_20190518 |
| 20180628_20180710 | 20180908_20181020 | 20190106_20190205 | 20190424_20190512 |
| 20180628_20180716 | 20180914_20180920 | 20190112_20190118 | 20190424_20190518 |
| 20180628_20180803 | 20180914_20180926 | 20190112_20190124 | 20190424_20190524 |
| 20180628_20180809 | 20180914_20181002 | 20190112_20190130 | 20190430_20190506 |
| 20180628_20180815 | 20180914_20181020 | 20190118_20190130 | 20190430_20190518 |
| 20180704_20180710 | 20180914_20181101 | 20190118_20190211 | 20190430_20190530 |
| 20180704_20180716 | 20180920_20180926 | 20190118_20190217 | 20190506_20190512 |
| 20180704_20180722 | 20180920_20181002 | 20190124_20190130 | 20190506_20190518 |
| 20180704_20180728 | 20180920_20181008 | 20190124_20190217 | 20190506_20190524 |
| 20180704_20180803 | 20180920_20181014 | 20190124_20190223 | 20190512_20190518 |
| 20180704_20180821 | 20180920_20181020 | 20190130_20190217 | 20190512_20190605 |
| 20180710_20180716 | 20180926_20181002 | 20190130_20190223 | 20190530_20190605 |
| 20180710_20180722 | 20180926_20181008 | 20190205_20190211 | 20190530_20190617 |
| 20180710_20180728 | 20180926_20181014 | 20190205_20190217 | 20190605_20190629 |
| 20180710_20180809 | 20180926_20181020 | 20190205_20190223 | 20190605_20190705 |
| 20180710_20180815 | 20180926_20181101 | 20190205_20190301 | 20190611_20190617 |
| 20180716_20180722 | 20181101_20181107 | 20190205_20190307 | 20190611_20190623 |
| 20180716_20180728 | 20181101_20181113 | 20190211_20190217 | 20190611_20190629 |
| 20180716_20180803 | 20181101_20181201 | 20190211_20190301 | 20190611_20190705 |
| 20180716_20180809 | 20181113_20181119 | 20190211_20190313 | 20190611_20190711 |
| 20180716_20180815 | 20181113_20181213 | 20190217_20190223 | 20190617_20190623 |
| 20180716_20180902 | 20181119_20181201 | 20190217_20190301 | 20190617_20190629 |
| 20180722_20180728 | 20181119_20181219 | 20190217_20190307 | 20190617_20190705 |
| 20180728_20180803 | 20181201_20181213 | 20190217_20190313 | 20190617_20190711 |
| 20180728_20180809 | 20181201_20181219 | 20190223_20190301 | 20190617_20190717 |
| 20180728_20180815 | 20181201_20181225 | 20190223_20190307 | 20190623_20190711 |
| 20180728_20180821 | 20181201_20181231 | 20190301_20190307 | 20190623_20190717 |
| 20180728_20180902 | 20181207_20181213 | 20190301_20190313 | 20190705_20190711 |
| 20180728_20180908 | 20181207_20181225 | 20190301_20190319 | 20190705_20190717 |
| 20180803_20180815 | 20181207_20181231 | 20190301_20190325 | 20190705_20190723 |
| 20180803_20180827 | 20181213_20181219 | 20190301_20190331 | 20190705_20190729 |
| 20180803_20180908 | 20181213_20181231 | 20190307_20190313 | 20190711_20190723 |
| 20180803_20180920 | 20181213_20190106 | 20190307_20190319 | 20190711_20190729 |
| 20180809_20180815 | 20181213_20190112 | 20190307_20190325 | 20190717_20190723 |
| 20180809_20180902 | 20181219_20181225 | 20190313_20190319 | 20190717_20190729 |
| 20180809_20180908 | 20181219_20181231 | 20190313_20190331 | 20190717_20190804 |
| 20180809_20180914 | 20181219_20190106 | 20190319_20190412 | 20190717_20190810 |
| 20180809_20180920 | 20181219_20190112 | 20190325_20190331 | 20190717_20190816 |
| 20180815_20180902 | 20181219_20190118 | 20190325_20190406 | 20190723_20190729 |
| 20180815_20180908 | 20181225_20181231 | 20190325_20190412 | 20190804_20190822 |
| 20180821_20180827 | 20181225_20190106 | 20190325_20190418 | 20190804_20190828 |
| 20180821_20180902 | 20181225_20190112 | 20190331_20190406 | 20190810_20190903 |
| 20180821_20180908 | 20181225_20190118 | 20190331_20190412 | 20190810_20190909 |
| 20180821_20180914 | 20181225_20190124 | 20190331_20190418 | 20190816_20190822 |
| 20180821_20180920 | 20181231_20190106 | 20190331_20190424 | 20190816_20190915 |
| 20180902_20180908 | 20181231_20190112 | 20190331_20190430 | 20190822_20190828 |
| 20180902_20180914 | 20181231_20190118 | 20190406_20190418 | 20190822_20190903 |
| 20180902_20180920 | 20181231_20190124 | 20190406_20190424 | 20190822_20190915 |
| 20180902_20180926 | 20181231_20190130 | 20190406_20190506 | 20190822_20190921 |

|                   |                   |                   |                   |
|-------------------|-------------------|-------------------|-------------------|
| 20190903_20190909 | 20200206_20200218 | 20200518_20200524 | 20201015_20201021 |
| 20190903_20190915 | 20200206_20200224 | 20200518_20200605 | 20201015_20201102 |
| 20190903_20190927 | 20200206_20200301 | 20200518_20200611 | 20201015_20201108 |
| 20190903_20191003 | 20200206_20200307 | 20200518_20200617 | 20201015_20201114 |
| 20190909_20190915 | 20200212_20200218 | 20200524_20200605 | 20201021_20201027 |
| 20190909_20190927 | 20200212_20200224 | 20200524_20200611 | 20201021_20201114 |
| 20190909_20191003 | 20200212_20200301 | 20200524_20200623 | 20201021_20201120 |
| 20190909_20191009 | 20200212_20200307 | 20200611_20200623 | 20201027_20201102 |
| 20190915_20191003 | 20200212_20200313 | 20200611_20200629 | 20201027_20201108 |
| 20190915_20191009 | 20200218_20200224 | 20200617_20200629 | 20201027_20201114 |
| 20190915_20191015 | 20200218_20200307 | 20200617_20200705 | 20201027_20201120 |
| 20190921_20190927 | 20200224_20200301 | 20200617_20200717 | 20201102_20201120 |
| 20190921_20191003 | 20200224_20200307 | 20200623_20200705 | 20201102_20201126 |
| 20190921_20191015 | 20200224_20200313 | 20200623_20200717 | 20201102_20201202 |
| 20190921_20191021 | 20200224_20200319 | 20200623_20200723 | 20201108_20201114 |
| 20190927_20191003 | 20200301_20200319 | 20200629_20200705 | 20201108_20201126 |
| 20190927_20191009 | 20200301_20200325 | 20200629_20200729 | 20201120_20201202 |
| 20190927_20191015 | 20200307_20200313 | 20200705_20200717 | 20201120_20201208 |
| 20191009_20191021 | 20200307_20200325 | 20200705_20200723 | 20201120_20201214 |
| 20191009_20191027 | 20200307_20200331 | 20200705_20200729 | 20201120_20201220 |
| 20191009_20191108 | 20200313_20200319 | 20200705_20200804 | 20201126_20201202 |
| 20191015_20191021 | 20200313_20200325 | 20200717_20200723 | 20201126_20201208 |
| 20191015_20191027 | 20200313_20200331 | 20200717_20200729 | 20201126_20201214 |
| 20191021_20191120 | 20200319_20200331 | 20200717_20200804 | 20201126_20201220 |
| 20191027_20191102 | 20200319_20200418 | 20200717_20200810 | 20201126_20201226 |
| 20191027_20191108 | 20200325_20200331 | 20200723_20200804 | 20201202_20201208 |
| 20191027_20191114 | 20200325_20200418 | 20200723_20200810 | 20201202_20201214 |
| 20191027_20191120 | 20200331_20200418 | 20200723_20200816 | 20201202_20201220 |
| 20191102_20191114 | 20200406_20200418 | 20200816_20200903 | 20201202_20201226 |
| 20191102_20191120 | 20200406_20200424 | 20200822_20200921 | 20201202_20210101 |
| 20191102_20191202 | 20200412_20200418 | 20200903_20201003 | 20201208_20201226 |
| 20191108_20191114 | 20200412_20200424 | 20200909_20200915 | 20201208_20210101 |
| 20191108_20191120 | 20200412_20200506 | 20200909_20200921 | 20201208_20210107 |
| 20191114_20191208 | 20200412_20200512 | 20200909_20200927 | 20201214_20201220 |
| 20191114_20191214 | 20200418_20200424 | 20200909_20201009 | 20201214_20210101 |
| 20191120_20191126 | 20200418_20200430 | 20200915_20200927 | 20201214_20210107 |
| 20191120_20191208 | 20200418_20200506 | 20200915_20201003 | 20201214_20210113 |
| 20191120_20191214 | 20200418_20200512 | 20200915_20201009 | 20201220_20201226 |
| 20200101_20200107 | 20200418_20200518 | 20200915_20201015 | 20201220_20210101 |
| 20200101_20200113 | 20200424_20200430 | 20200921_20200927 | 20201220_20210107 |
| 20200101_20200125 | 20200424_20200506 | 20200921_20201015 | 20201220_20210113 |
| 20200101_20200131 | 20200424_20200512 | 20200921_20201021 | 20201220_20210119 |
| 20200107_20200113 | 20200424_20200518 | 20200927_20201003 | 20201226_20210101 |
| 20200107_20200119 | 20200424_20200524 | 20200927_20201009 | 20201226_20210107 |
| 20200113_20200119 | 20200430_20200506 | 20200927_20201027 | 20201226_20210113 |
| 20200113_20200125 | 20200430_20200512 | 20201003_20201009 | 20201226_20210119 |
| 20200113_20200131 | 20200430_20200518 | 20201003_20201015 | 20201226_20210125 |
| 20200119_20200131 | 20200430_20200524 | 20201003_20201021 | 20210101_20210113 |
| 20200119_20200206 | 20200506_20200512 | 20201009_20201015 | 20210101_20210119 |
| 20200125_20200212 | 20200506_20200518 | 20201009_20201021 | 20210113_20210125 |
| 20200125_20200218 | 20200506_20200524 | 20201009_20201027 | 20210119_20210125 |
| 20200131_20200218 | 20200512_20200605 | 20201009_20201102 | 20210119_20210131 |
| 20200131_20200224 | 20200512_20200611 | 20201009_20201108 | 20210119_20210212 |



20210131\_20210302  
20210206\_20210212  
20210206\_20210218  
20210206\_20210224  
20210206\_20210302

20210206\_20210308  
20210212\_20210218  
20210212\_20210224  
20210212\_20210302  
20210212\_20210308

20210218\_20210314  
20210218\_20210320  
20210224\_20210302  
20210224\_20210308  
20210326\_20210413

### *GNSS Reference Frame Comparison of Plotted Time Series:*

In the main paper, we present results using the 24-hour final GNSS solutions from NGL, which are provided in three components (east, north, up) and aligned to the fixed, Pacific Plate reference frame to minimize linear trends from tectonic plate motions. NGL also provides GNSS solutions aligned to the International GNSS Service-14 (IGS14) reference frame. IGS14 is based on the International Terrestrial Reference Frame (ITRF) and holds a no-net-rotation (NNR), by which the motion of each tectonic plate is held fixed with respect to the weighted average of all the world's plate velocities. Here we present plotted time series from CRIM, MKEA, and BLBP stations (Supplementary Figures S1-S3, respectively), for comparison. Westward and northward motions are seen in Figures S1-S3, corresponding to the motion of the Pacific Plate in the NNR IGS14 reference frame. This motion is less obvious in Figure S1 because it is superimposed on the effects of the volcanic activity at CRIM station. Motions in the up direction should remain unaffected, regardless of reference frame used. These supplementary figures can be compared with Figures 8, 10, and 11, respectively, in the main manuscript.

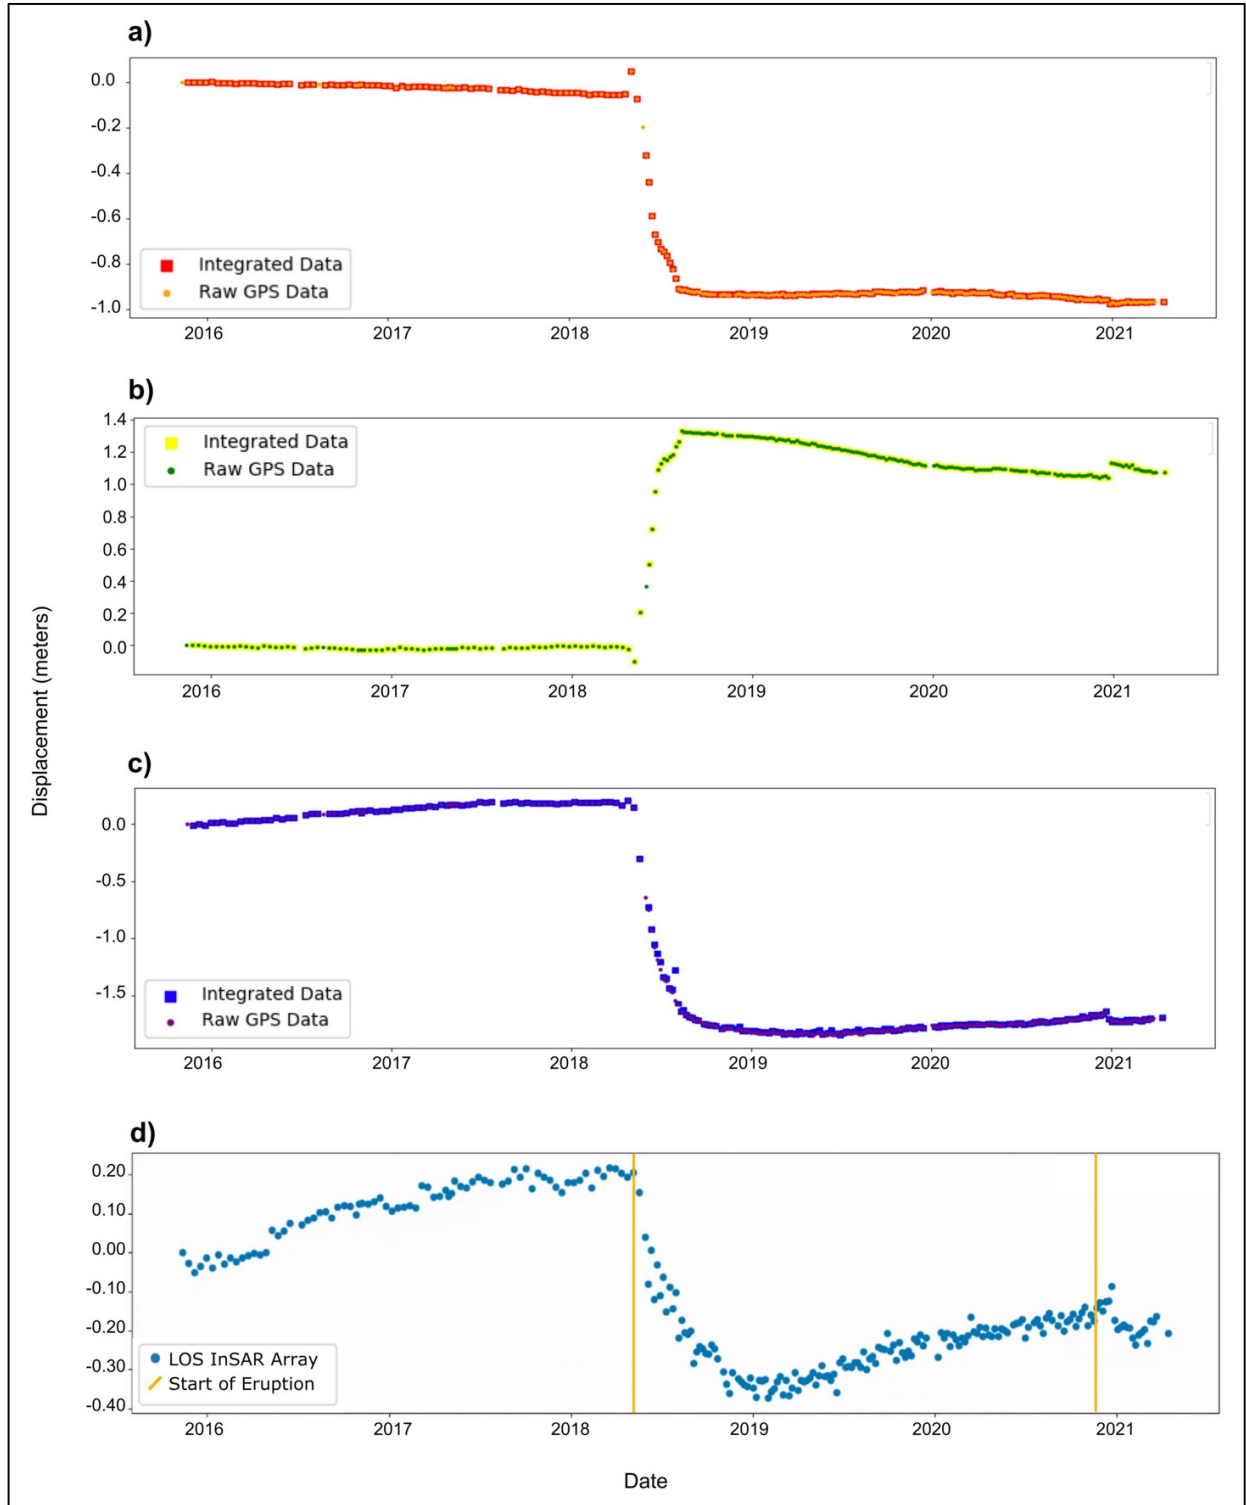

**Figure S1:** Integrated results compared to original, raw GNSS time series aligned to the ITRF-14 reference frame in **the a)** east-, **b)** north-, and **c)** up-components of motion at CRIM GNSS station (19.395°N, -155.274°W). **d)** DInSAR LOS time series at the same pixel, over CRIM station.

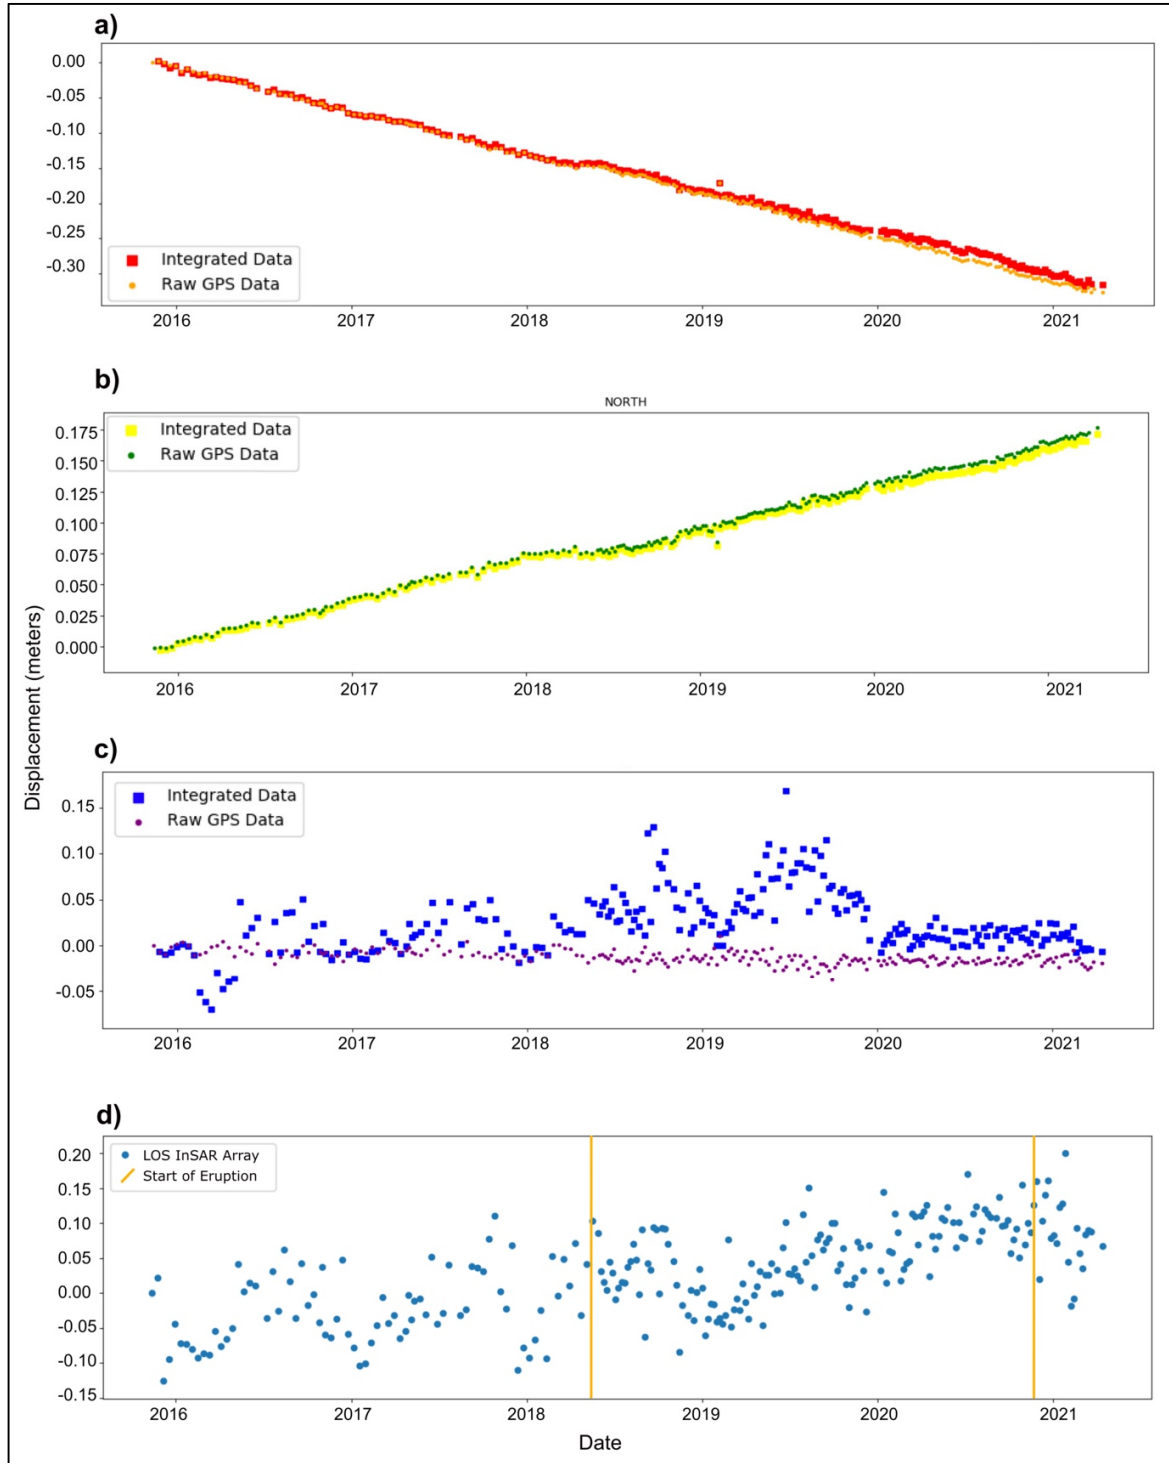

**Figure S2:** Integrated results compared to original, raw GNSS time series aligned to the ITRF-14 reference frame in the **a)** east-, **b)** north-, and **c)** up-components of motion at MKEA GNSS station (19.801°N, -155.456°W). Motion in the east-west and north-south directions are slightly more constrained, while motion in the up-down direction is significantly transformed after combining the DInSAR and GNSS datasets together. **d)** DInSAR LOS time series at the same pixel, MKEA station.

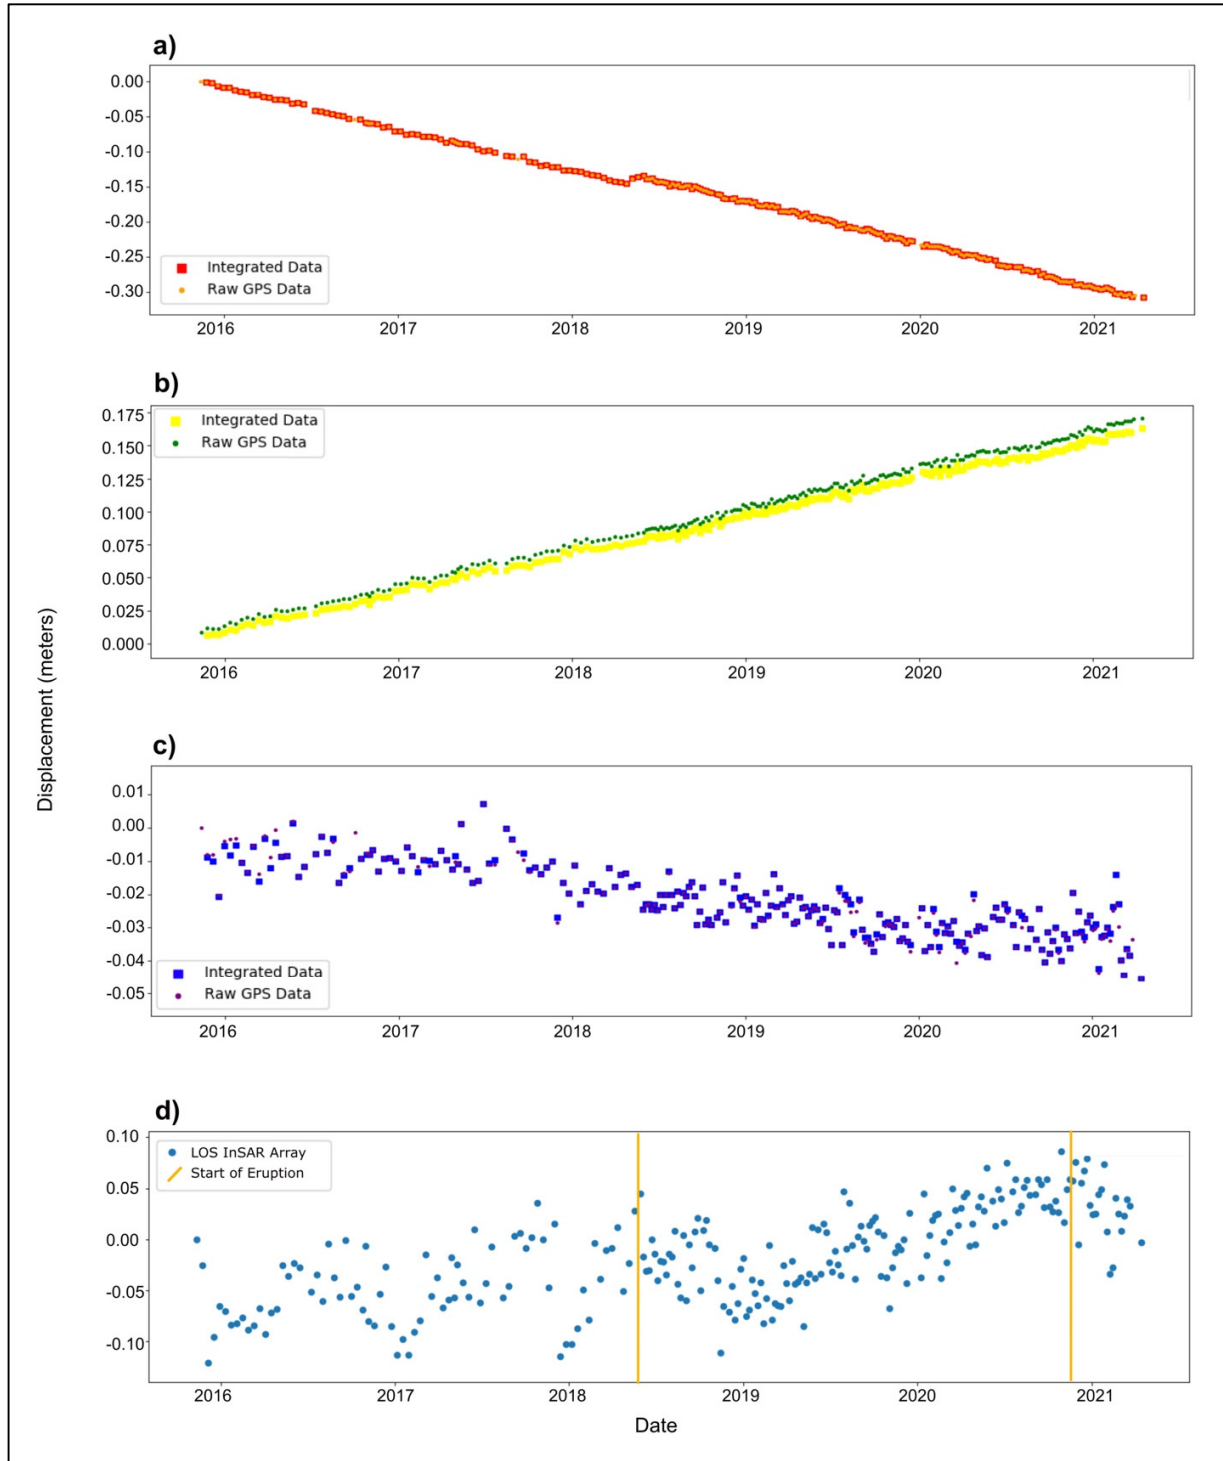

**Figure S3:** Integrated results compared to original, raw GNSS time series aligned to the ITRF-14 reference frame in the **a)** east-, **b)** north-, and **c)** up-components of motion at BLBP GNSS station ( $19.355^{\circ}\text{N}$ ,  $-155.711^{\circ}\text{W}$ ). **d)** DInSAR LOS time series at the same pixel, BLBP station.

*Supplementary Equations:*

The energy function is as follows:

$$U(b/a) = \sum_{i=1}^N \frac{(b_i - a_i)^2}{2\sigma_i^2} \quad (S1)$$

where  $U\left(\frac{a}{b}\right)$  is the likelihood energy,  $b$  is the observation with uncertainty,  $\sigma$ ,  $a$  is the unknown parameter, and  $N$  is the number of observations, or pixels within the acquisition. The resulting adaptation of Equation S1 to our geodetic displacement datasets is:

$$\begin{aligned} U(d^{LOS}, d_x^{GPS}, d_y^{GPS}, d_z^{GPS} / d_x, d_y, d_z) = \\ \sum_{i=1}^N C^{LOS} (d^{LOS} - S_x^{LOS} d_x - S_y^{LOS} d_y - S_z^{LOS} d_z)^2 \\ + C_x^{GPS} (d_x^{GPS} - d_x)^2 + C_y^{GPS} (d_y^{GPS} - d_y)^2 + C_z^{GPS} (d_z^{GPS} - d_z)^2 \end{aligned} \quad (S2)$$

with coefficients

$$\begin{aligned} C^{LOS} &= \frac{1}{2(\sigma^{LOS})^2}, \\ C_x^{GPS} &= \frac{1}{2(\sigma_x^{GPS})^2}, \quad C_y^{GPS} = \frac{1}{2(\sigma_y^{GPS})^2}, \quad C_z^{GPS} = \frac{1}{2(\sigma_z^{GPS})^2} \end{aligned} \quad (S3)$$

where  $\sigma$  is the standard deviation for the measurements,  $d^{LOS}$  is the cumulative LOS displacement,  $[S_x^{LOS}, S_y^{LOS}, S_z^{LOS}]$  are the unit vectors pointing from the ground to the satellite, and  $[d_x^{GPS}, d_y^{GPS}, d_z^{GPS}]$  are the 3D displacements from the kriging interpolated GNSS data.

The global minimum of equation S2 is achieved when the first partial derivatives,  $[\frac{\partial U}{\partial d_x}, \frac{\partial U}{\partial d_y}, \frac{\partial U}{\partial d_z}]$ , are equal to zero.

$$\begin{aligned} \frac{\partial U}{\partial d_x} &= -2C^{LOS} S_x^{LOS} (d^{LOS} - S_x^{LOS} d_x - S_y^{LOS} d_y - S_z^{LOS} d_z) \\ &\quad - 2C_x^{GPS} (d_x^{GPS} - d_x) \\ &= 0 \\ \frac{\partial U}{\partial d_y} &= -2C^{LOS} S_y^{LOS} (d^{LOS} - S_x^{LOS} d_x - S_y^{LOS} d_y - S_z^{LOS} d_z) \\ &\quad - 2C_y^{GPS} (d_y^{GPS} - d_y) \\ &= 0 \\ \frac{\partial U}{\partial d_z} &= -2C^{LOS} S_z^{LOS} (d^{LOS} - S_x^{LOS} d_x - S_y^{LOS} d_y - S_z^{LOS} d_z) \\ &\quad - 2C_z^{GPS} (d_z^{GPS} - d_z) \\ &= 0 \end{aligned} \quad (S4)$$

Rewritten in matrix notation, these partial derivatives take the following form:

$$\begin{bmatrix} a_{11} & a_{12} & a_{13} \\ a_{21} & a_{22} & a_{23} \\ a_{31} & a_{32} & a_{33} \end{bmatrix} \begin{bmatrix} d_x \\ d_y \\ d_z \end{bmatrix} = \begin{bmatrix} D_x \\ D_y \\ D_z \end{bmatrix} \quad (S5)$$

In order to solve for the DInSAR+GNSS integrated data,  $[d_x, d_y, d_z]$ , we perform an inversion of equation S5. Error estimates,  $[\sigma_x, \sigma_y, \sigma_z]$ , also are calculated for the 3D surface displacements as in Samsonov et al. [2006].

$$\begin{aligned} \sigma_{d_x}^2 &= \left( \frac{\partial d_x}{\partial d_{LOS}} \right)^2 (\sigma^{LOS})^2 \\ &+ \left( \frac{\partial d_x}{\partial d_x^{GPS}} \right)^2 (\sigma_x^{GPS})^2 + \left( \frac{\partial d_x}{\partial d_y^{GPS}} \right)^2 (\sigma_y^{GPS})^2 + \left( \frac{\partial d_x}{\partial d_z^{GPS}} \right)^2 (\sigma_z^{GPS})^2 \\ \sigma_{d_y}^2 &= \left( \frac{\partial d_y}{\partial d_{LOS}} \right)^2 (\sigma^{LOS})^2 \\ &+ \left( \frac{\partial d_y}{\partial d_x^{GPS}} \right)^2 (\sigma_x^{GPS})^2 + \left( \frac{\partial d_y}{\partial d_y^{GPS}} \right)^2 (\sigma_y^{GPS})^2 + \left( \frac{\partial d_y}{\partial d_z^{GPS}} \right)^2 (\sigma_z^{GPS})^2 \\ \sigma_{d_z}^2 &= \left( \frac{\partial d_z}{\partial d_{LOS}} \right)^2 (\sigma^{LOS})^2 \\ &+ \left( \frac{\partial d_z}{\partial d_x^{GPS}} \right)^2 (\sigma_x^{GPS})^2 + \left( \frac{\partial d_z}{\partial d_y^{GPS}} \right)^2 (\sigma_y^{GPS})^2 + \left( \frac{\partial d_z}{\partial d_z^{GPS}} \right)^2 (\sigma_z^{GPS})^2 \end{aligned} \quad (S6)$$

where

$$\begin{aligned} \frac{\partial d_x}{\partial d_{LOS}} &= \frac{c^{LOS}}{|A|} (S_x^{LOS} b_{11} + S_y^{LOS} b_{12} + S_z^{LOS} b_{13}), \\ \frac{\partial d_x}{\partial d_x^{GPS}} &= \frac{c_x^{GPS} b_{11}}{|A|}, \quad \frac{\partial d_x}{\partial d_y^{GPS}} = \frac{c_y^{GPS} b_{12}}{|A|}, \quad \frac{\partial d_x}{\partial d_z^{GPS}} = \frac{c_z^{GPS} b_{13}}{|A|} \\ \frac{\partial d_y}{\partial d_{LOS}} &= \frac{c^{LOS}}{|A|} (S_x^{LOS} b_{21} + S_y^{LOS} b_{22} + S_z^{LOS} b_{23}) \\ \frac{\partial d_y}{\partial d_x^{GPS}} &= \frac{c_x^{GPS} b_{21}}{|A|}, \quad \frac{\partial d_y}{\partial d_y^{GPS}} = \frac{c_y^{GPS} b_{22}}{|A|}, \quad \frac{\partial d_y}{\partial d_z^{GPS}} = \frac{c_z^{GPS} b_{23}}{|A|} \\ \frac{\partial d_z}{\partial d_{LOS}} &= \frac{c^{LOS}}{|A|} (S_x^{LOS} b_{31} + S_y^{LOS} b_{32} + S_z^{LOS} b_{33}) \\ \frac{\partial d_z}{\partial d_x^{GPS}} &= \frac{c_x^{GPS} b_{31}}{|A|}, \quad \frac{\partial d_z}{\partial d_y^{GPS}} = \frac{c_y^{GPS} b_{32}}{|A|}, \quad \frac{\partial d_z}{\partial d_z^{GPS}} = \frac{c_z^{GPS} b_{33}}{|A|} \end{aligned} \quad (S7)$$

and

$$B = \begin{bmatrix} b_{11} & b_{12} & b_{13} \\ b_{21} & b_{22} & b_{23} \\ b_{31} & b_{32} & b_{33} \end{bmatrix} = A^{-1} |A| \quad (S8)$$

### ***Uncertainties of GNSS time series results:***

24-Hour final solution GNSS time series data from 48 different stations and aligned to the local, fixed, Pacific Plate reference frame, were obtained from the Nevada Geodetic Laboratory (NGL), University of Nevada Reno (<http://geodesy.unr.edu/>), and decimated to match the sampling rate of the InSAR time series. Figure S4 shows the uncertainty results for the GNSS displacement data. Uncertainty values in the vertical direction at MKEA GNSS station are a magnitude higher ( $10^{-3}$  versus  $10^{-4}$ ) than other stations between November 2015 and December 2019, shown in the northern part of the island in subplots a-c, below. Figure S4, subplots d-e, show the highest uncertainties, which reach up to 7.63 mm in the east-component of motion, 3.28 mm in the north-component, and 9.66 mm in the up-direction of motion. Median errors for the raw GNSS data in the east, north, and up directions are 0.81 mm, 0.74 mm, and 3.27 mm.



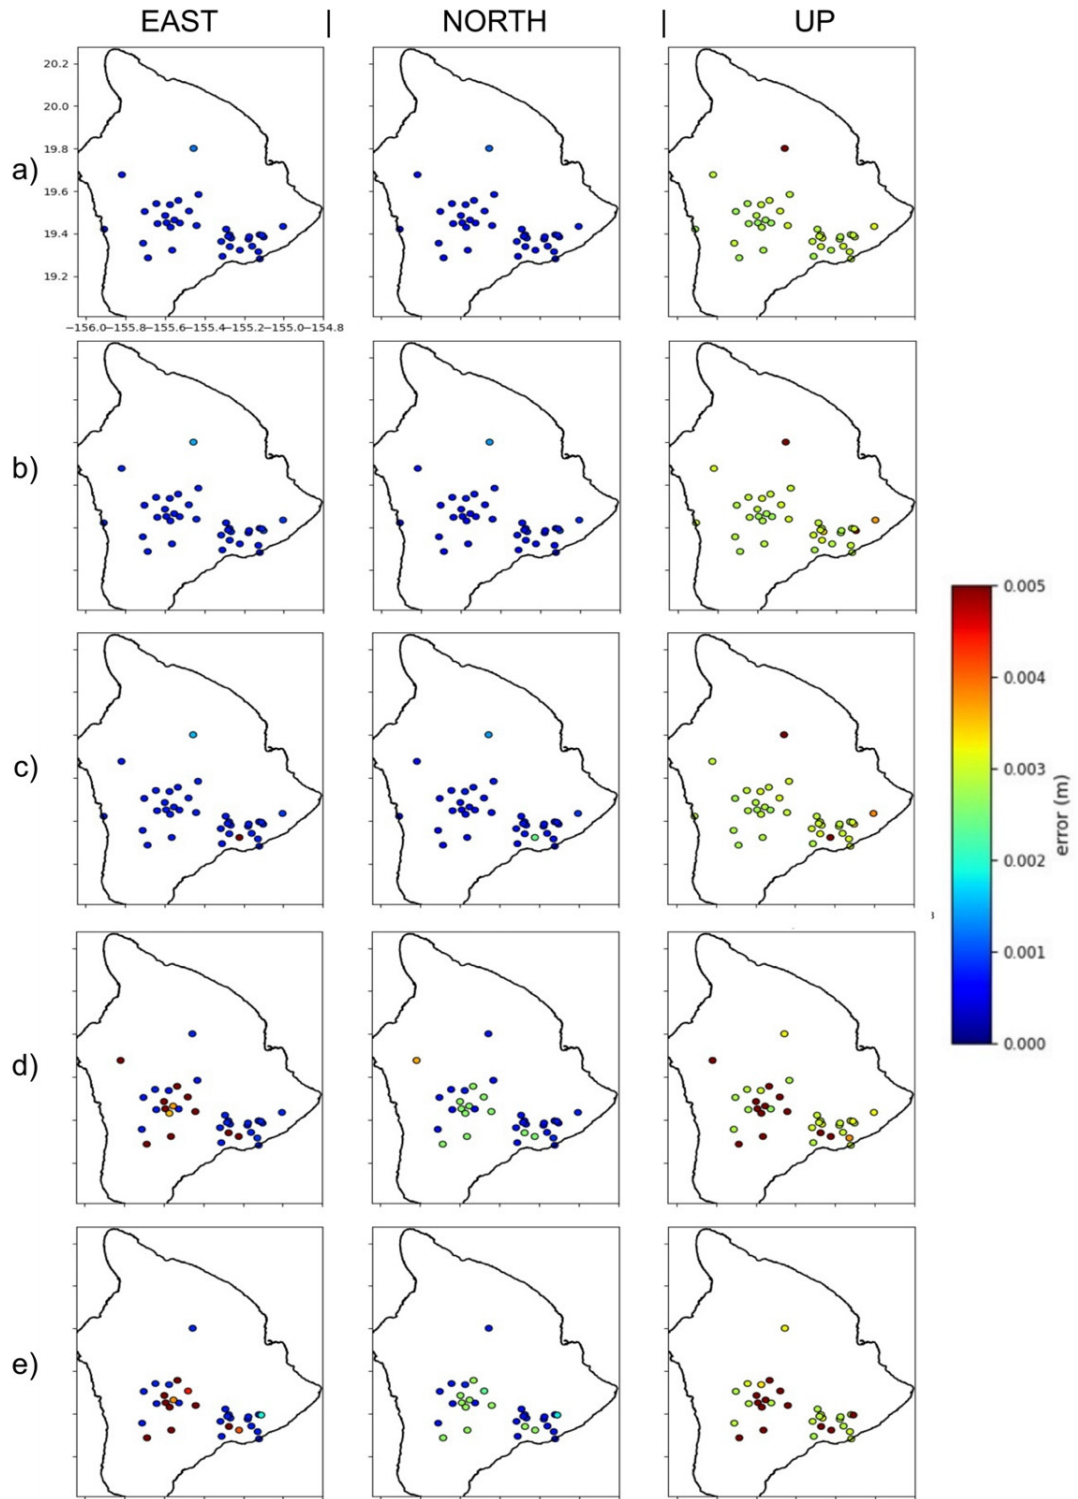

**Figure S4:** Raw GNSS uncertainty results shown at 48 GNSS stations used in this study from **a)** November 18, 2017, **b)** November 07, 2018, **c)** November 14, 2019, **d)** November 08, 2020, and **e)** April 13, 2021. Maximum GNSS station data error measures up to 9.65 millimeters in the up direction of motion.

For the 3D displacement maps, an additional error is introduced when we interpolate data from the 48 GNSS stations into a variogram using the ordinary kriging algorithm. Figure S5 shows the isolated, total variance distribution of the GNSS 3D displacement maps as a direct result of interpolating undefined points across the spatial field. Error measurements are minimal at the location of the individual GNSS stations, where data is provided, and as the algorithm interpolates the measurements between the stations, more variance is produced (reaching up to 4.5 mm<sup>2</sup>).

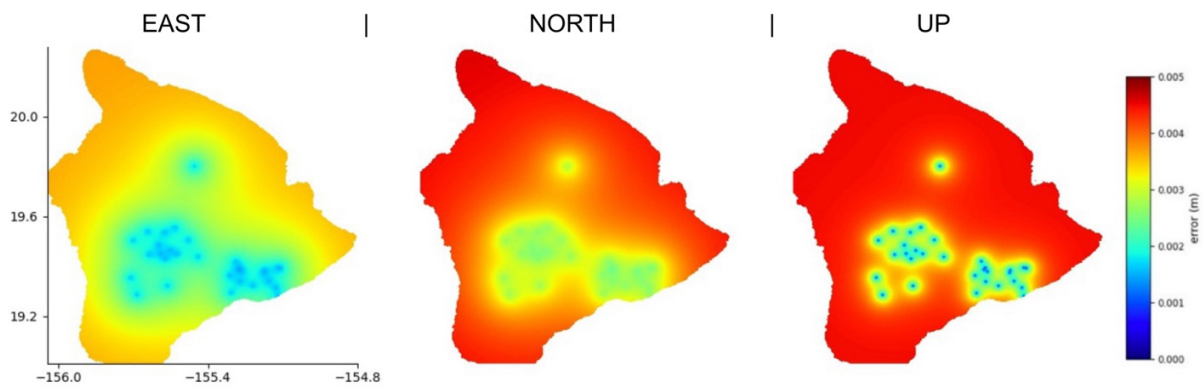

**Figure S5:** Variance associated with the Kriging interpolation used to generate the GNSS displacement map from the final time slice in our time series on April 13, 2021.

### *Uncertainties of integrated time series results:*

Uncertainties associated with the final, integrated 3D displacement maps and the plotted time series are automatically generated with the corresponding time series products. Individual uncertainties from the DInSAR and GNSS data are combined using the same methodology as the real data (See Supplementary Equations 6-8). This process combines errors from the individual DInSAR time series, the GNSS datasets, and additional error introduced from applying the kriging algorithm to interpolate the GNSS data. As a result of the interpolation method, uncertainties associated with the integrated, cumulative 3D displacement maps are greater than the uncertainties calculated at a single pixel. Figure S6 shows the final, integrated uncertainty distribution for the 3D displacement maps. Maximum uncertainties in the east, north, and up directions are 7.07 cm, 5.82 cm, and 5.72 cm, respectively.

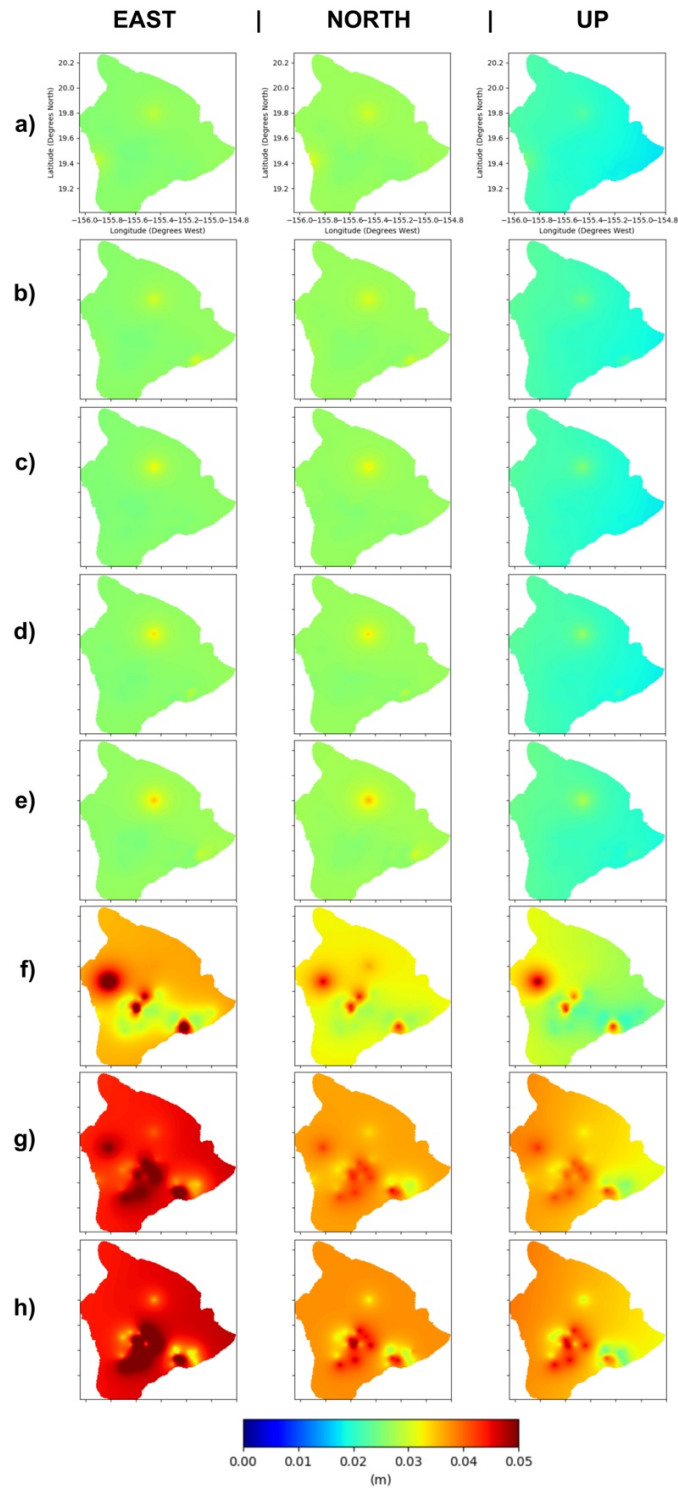

**Figure S6:** Final, cumulative uncertainty distribution for the 3D integrated displacement maps. Uncertainty results are combined from errors associated with the raw DInSAR and GNSS time series data and additional error introduced from applying the kriging algorithm to interpolate the GNSS data and produce variograms. Subplots show the uncertainty from a) December 29, 2015; b) December 23, 2016; c) November 18, 2017; d) May 5, 2018; e) November 7, 2018; f) December 14, 2019; g) May 12, 2020; and h) April 13, 2021.

At a single pixel, error estimates are more constrained than the original, raw GNSS or DInSAR errors alone. The north component of motion from the raw GNSS dataset consistently has the lowest error bounds compared to the east and up directions of motion, as well as the LOS DInSAR time series data. In most cases, uncertainty in the east and up directions of motion are significantly improved, while the north component of motion remains constant or is slightly reduced.

For CRIM GNSS station (Figure S7), the median uncertainties for the raw GNSS time series data in the east, north, and up directions of motion are 0.77 mm, 0.70 mm, and 3.06 mm, respectively. By combining the GNSS data with DInSAR time series, the fused data set has improved the median uncertainty of 0.76 mm, 0.70 mm, and 1.95 mm in the east, north, and up directions.

For NUPM GNSS station, (Figure S8), the median uncertainties for the raw GNSS time series data in the east, north, and up directions of motion are 0.73 mm, 0.67 mm, and 2.87 mm, respectively. By combining the GNSS data with DInSAR time series, the fused data set has improved median uncertainty of 0.73 mm, 0.67 mm, and 1.85 mm in the east, north, and up directions.

For MKEA GNSS station, (Figure S9), the median uncertainties for the raw GNSS time series data in the east, north, and up directions of motion are 1.34 mm, 1.21 mm, and 6.24 mm. By combining the GNSS data with DInSAR time series, the fused data set has improved median uncertainty of 1.23 mm, 1.13 mm, and 2.88 mm in the east, north, and up directions.

For BLBP GNSS station, (Figure S10), the median uncertainties for the raw GNSS time series data in the east, north, and up directions of motion are 0.74 mm, 0.68 mm, and 2.87 mm. By combining the GNSS data with DInSAR time series, the fused data set has improved median uncertainty of 0.74 mm, 0.68 mm, and 1.90 mm in the east, north, and up directions.

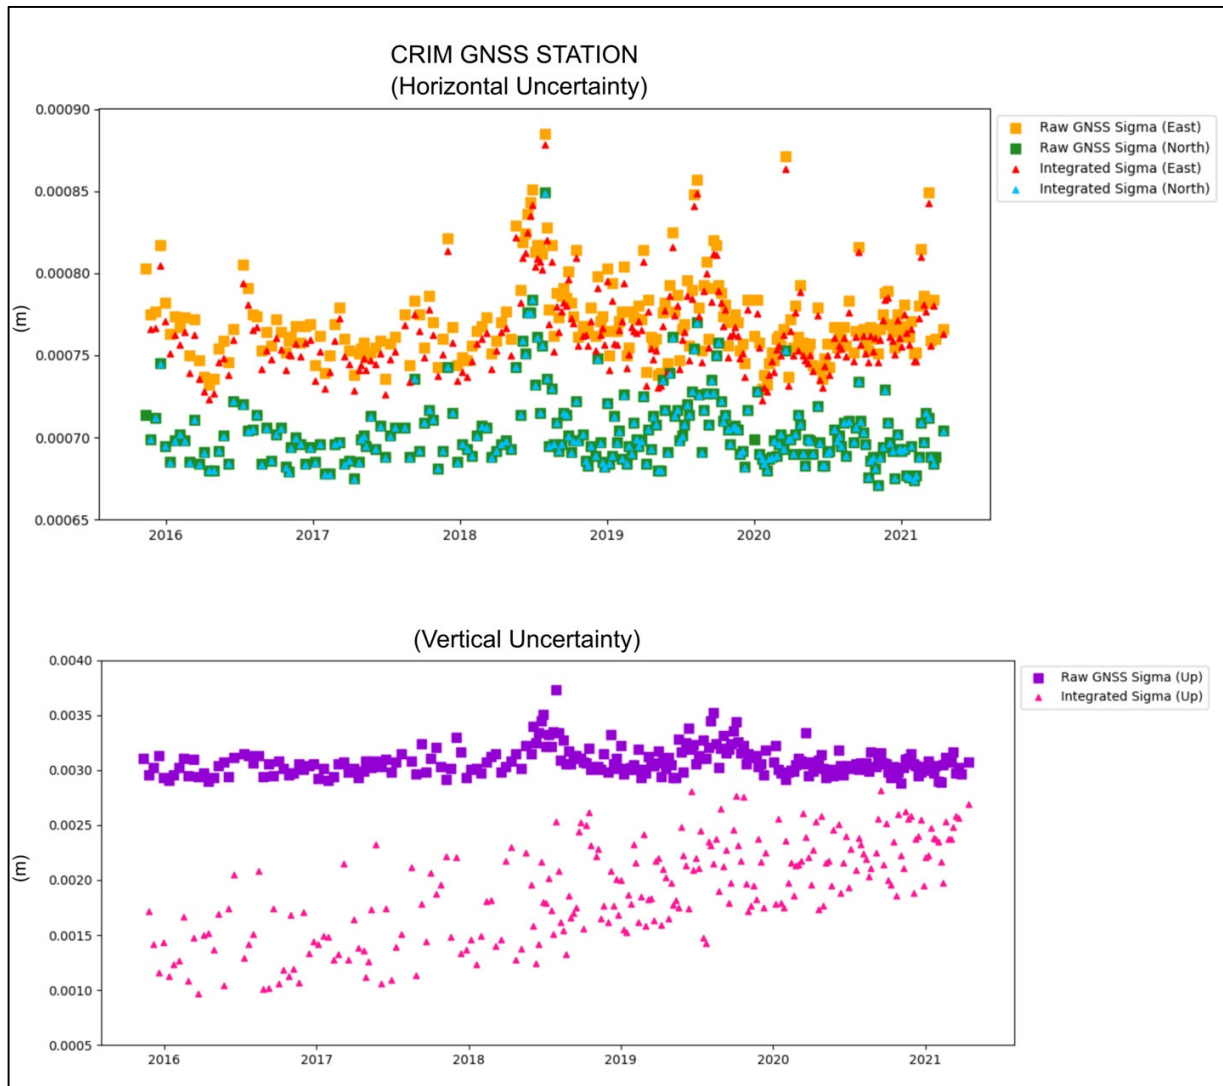

**Figure S7:** Integrated uncertainty for the plotted time series at the overlapping pixel location for CRIM GNSS station.

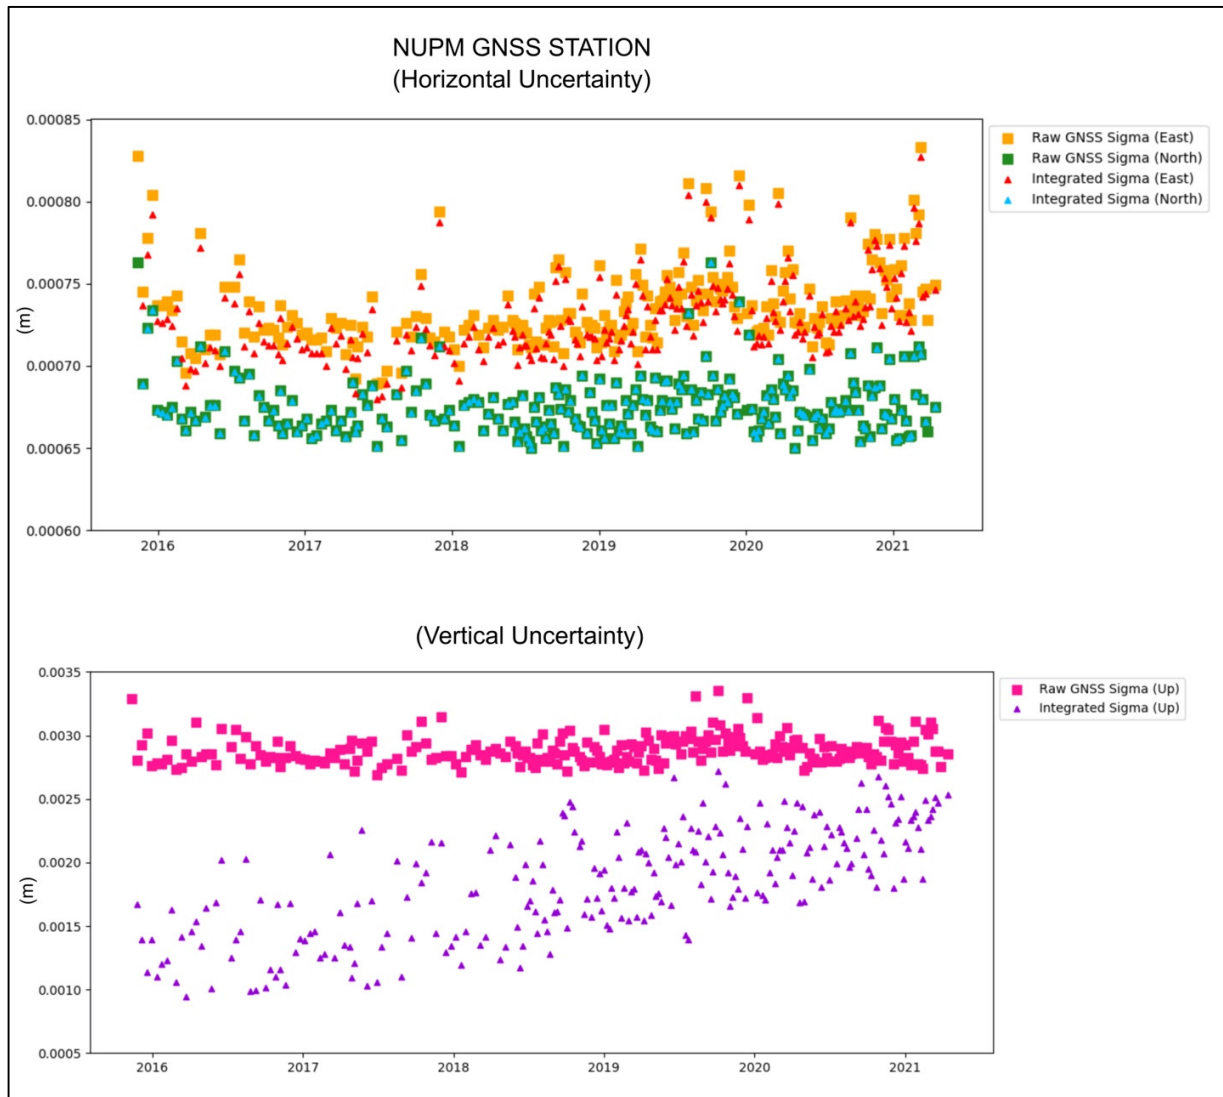

**Figure S8:** Integrated uncertainty for the plotted time series at the overlapping pixel location for NUPM GNSS station.

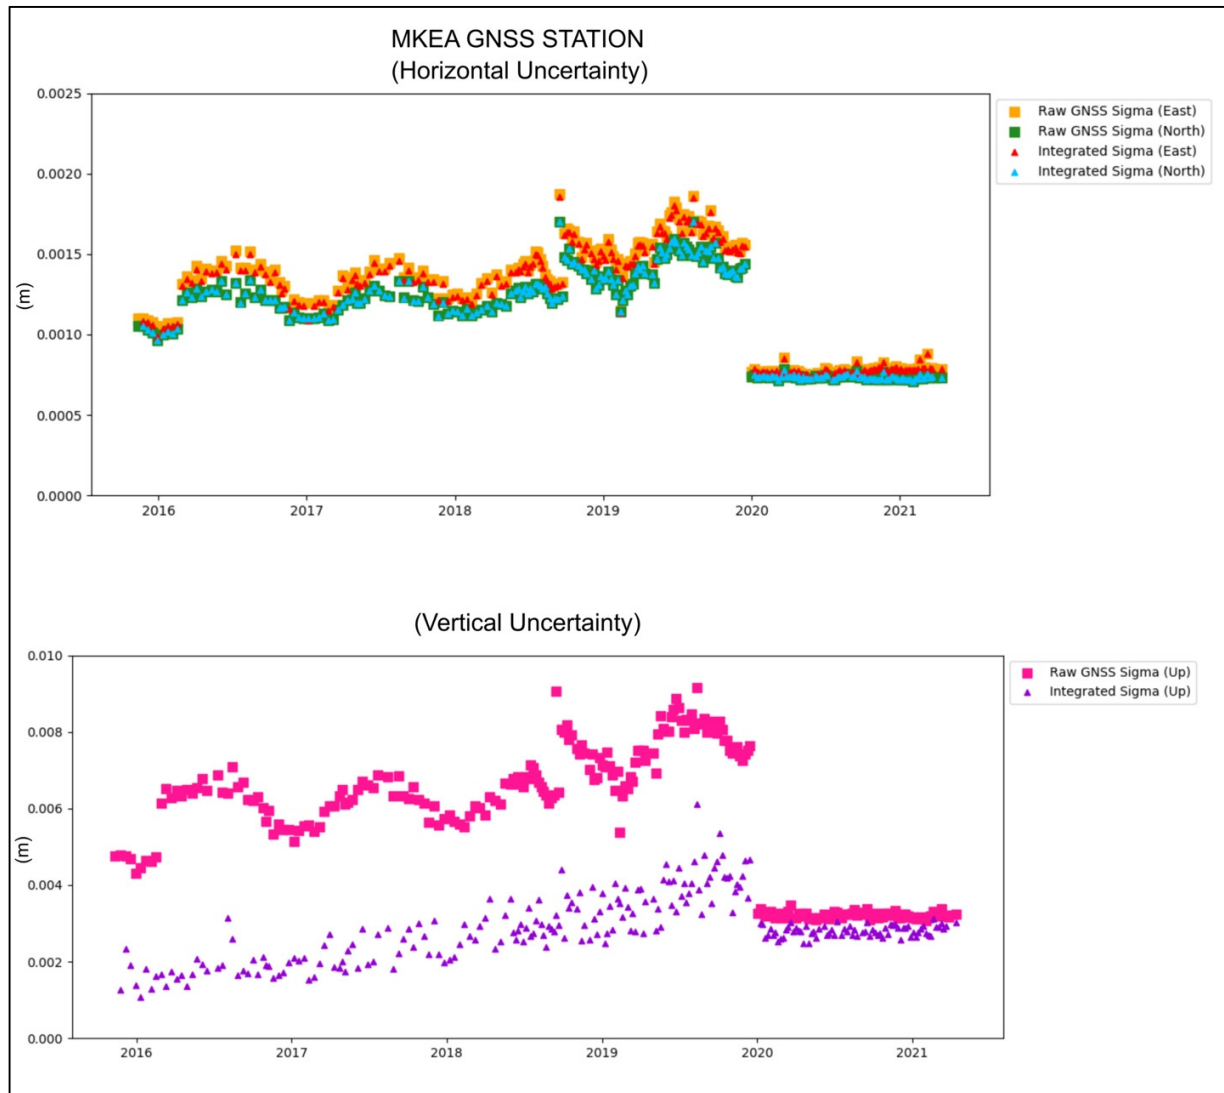

**Figure S9:** Integrated uncertainty for the plotted time series at the overlapping pixel location for MKEA GNSS station.



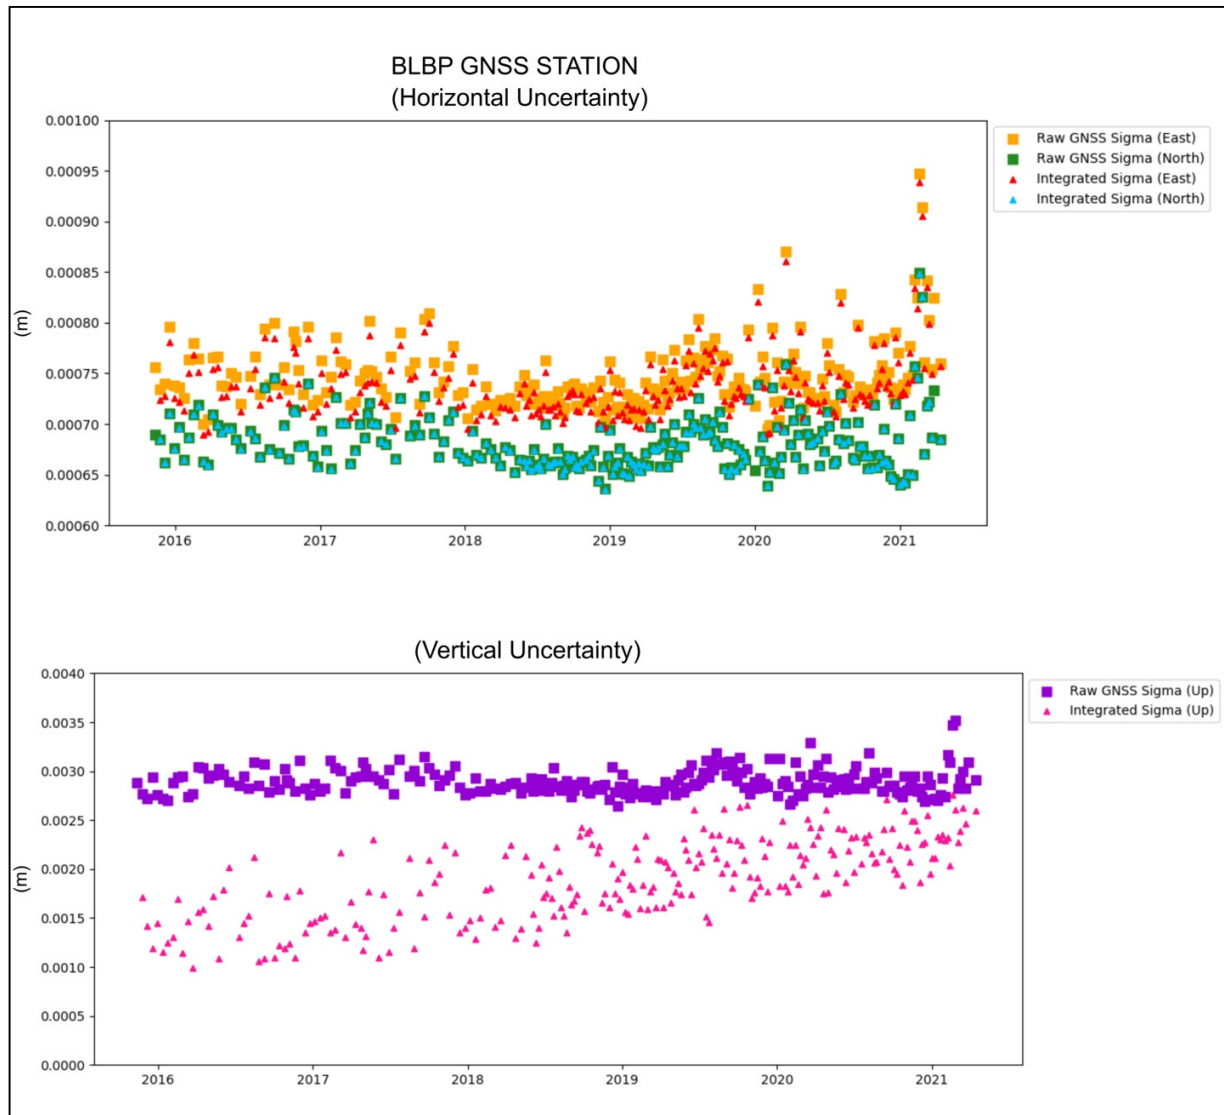

**Figure S10:** Integrated uncertainty for the plotted time series at the overlapping pixel location for BLBP GNSS station.
